# Supplementary material for: A 5-Gene Signature Is Closely Related to Tumor Immune Microenvironment and Predicts the Prognosis of Patients with Non-Small Cell Lung Cancer
Source: Biomed Res Int. 2020 Jan 9;2020:2147397. doi: 10.1155/2020/2147397 (PMC6975218; doi:10.1155/2020/2147397)
Supplement: Supplementary Materials — Supplemental material 1: 13,035 gene expression profiles from 130 tumor samples in data set GSE103584. We used CBERSORT to estimate the immune cell composition of 130 samples and quantify the relative levels of different cell types in a mixed cell population. Supplementary material 2: the standardized relative proportion of all cell types. [file 2147397.f1.xlsx]

## Sheet: Supplementary1
pathway	p_values	FDR	R01_003	R01_006	R01_012	R01_013	R01_014	R01_016	R01_017	R01_021	R01_022	R01_023	R01_024	R01_026	R01_028	R01_032	R01_034	R01_037	R01_038	R01_041	R01_043	R01_048	R01_049	R01_054	R01_056	R01_057	R01_059	R01_060	R01_061	R01_062	R01_063	R01_064	R01_066	R01_067	R01_068	R01_069	R01_072	R01_073	R01_076	R01_078	R01_079	R01_080	R01_081	R01_084	R01_089	R01_091	R01_094	R01_098	R01_099
ACEVEDO_LIVER_CANCER_WITH_H3K27ME3_DN	2.37988e-10	1.09689e-06	-0.314402	-0.34576	0.0683999	-0.04969	-0.160179	-0.110736	-0.202928	-0.0283168	-0.268957	-0.185936	0.160247	-0.0805098	0.0496792	-0.187417	-0.0342954	-0.0885683	0.253508	0.157322	-0.204499	-0.148489	0.285137	0.133706	0.0431608	0.0466371	-0.079526	-0.0286016	-0.1632	0.110084	0.133738	-0.0541373	-0.204326	0.123376	-0.00535995	0.240258	0.112899	0.162524	-0.0707545	-0.0923506	-0.0583697	-0.271833	-0.103948	0.189099	0.0300603	0.0453865	-0.194828	-0.126165	-0.115555
LEE_LIVER_CANCER_DENA_DN	7.3657e-10	3.39411e-06	0.0741968	-0.0922501	0.301149	0.0600113	0.360094	0.0314606	0.179373	0.0398377	0.16556	0.0524905	-0.0542303	-0.269464	0.204124	0.501537	0.11167	0.16039	0.181669	-0.0842545	0.344791	-0.334973	-0.222016	-0.210977	0.0173776	0.166316	-0.0216978	0.240463	-0.0029244	-0.167062	0.0796245	0.1758	-0.100503	0.261548	-0.158786	-0.0627054	-0.0273471	-0.0809637	0.360685	0.137175	0.0972471	0.414455	-0.0650467	-0.00673766	-0.113352	-0.146604	-0.0562154	0.218485	0.419931
BOYAULT_LIVER_CANCER_SUBCLASS_G123_DN	1.5842e-09	7.29839e-06	0.124477	0.0525417	0.203089	0.191597	0.134687	-0.125335	0.348509	0.1672	0.00950615	0.0315442	-0.0805493	-0.0681471	0.0581902	0.267983	0.107085	-0.0999747	-0.165674	-0.196542	0.191674	-0.0194608	-0.122242	-0.043836	-0.120208	0.0963307	-0.229912	0.226082	-0.198381	-0.282383	-0.212064	-0.0725557	0.10755	0.31489	-0.0787523	-0.432665	-0.298062	-0.339194	0.179238	0.0396681	0.109454	0.18526	-0.246769	-0.4116	0.201107	-0.110285	-0.0740567	0.0718784	0.29501
SABATES_COLORECTAL_ADENOMA_SIZE_DN	2.30964e-09	1.06382e-05	0.0116481	0.0177817	0.609206	0.446168	0.3964	-0.0838504	0.326668	-0.0216231	0.426302	0.416665	0.00545959	-0.391097	0.287111	0.0563549	0.178078	0.298577	0.207817	-0.107928	0.200941	-0.230333	-0.323847	0.366855	0.0646705	0.289363	0.187172	0.576221	-0.412845	-0.17176	0.0850058	-0.191513	0.142148	0.241318	-0.147856	-0.213683	-0.141367	-0.339569	0.245554	0.076797	0.45712	0.634484	0.431563	-0.321869	0.315346	0.197788	-0.0249642	0.193514	0.349809
VANTVEER_BREAST_CANCER_ESR1_UP	2.77449e-09	1.27765e-05	0.322017	0.376987	0.132604	0.00465472	0.152501	-0.106837	0.202923	0.111	0.10953	0.213712	-0.143996	-0.172643	0.0752024	0.136094	0.22436	0.0071501	0.090773	-0.0547071	0.247845	0.0333146	-0.270133	0.220477	0.138196	0.0657368	0.0575488	0.0757073	-0.034707	-0.237317	-0.179967	-0.0250187	-0.097885	0.0123923	-0.136815	0.0486545	-0.151722	-0.209864	0.0870203	0.303033	0.0978006	0.190335	0.194864	-0.215525	-0.0141739	0.000467125	-0.0518094	0.309819	0.0817058
NAKAYAMA_SOFT_TISSUE_TUMORS_PCA2_UP	3.81599e-09	1.75688e-05	-0.171881	-0.400168	-0.291069	-0.364183	-0.355246	0.0225566	-0.558033	-0.376127	-0.350699	-0.474868	0.345035	0.215288	-0.462054	-0.406602	-0.171223	0.236837	0.298482	0.28033	-0.223536	-0.51151	0.5862	0.406028	0.271051	0.252013	-0.0549575	-0.581368	0.173699	0.411154	0.363825	-0.329512	-0.159297	0.222585	0.552333	0.127377	0.485794	0.254268	-0.564328	-0.444932	-0.290223	-0.584204	-0.509109	0.457949	8.08977e-05	-0.158256	-0.481613	-0.0124128	-0.118596
PURBEY_TARGETS_OF_CTBP1_AND_SATB1_UP	7.8638e-09	3.61971e-05	0.150694	0.182496	0.153096	-0.16725	-0.11617	0.0021213	-0.171983	0.0384702	-0.34542	-0.144393	-0.0414253	0.0758474	0.0658262	0.00737483	0.166786	0.0162625	-0.138866	0.101962	0.110537	-0.0252053	0.18032	0.203314	0.281342	0.07059	0.191913	-0.101191	0.299253	0.316355	0.264758	-0.0275144	-0.1733	0.121274	0.215823	0.097021	0.268896	0.0767291	-0.248846	0.0929889	-0.129917	-0.119102	0.0324234	0.125538	-0.121141	-0.100758	-0.0417452	-0.300011	-0.419906
OHASHI_AURKB_TARGETS	1.64901e-08	7.58875e-05	-0.476983	-0.635062	-0.30419	-0.638821	-0.388306	-0.0995631	-0.439603	-0.61932	-0.553149	-0.713239	0.0784524	-0.362808	0.0830848	-0.28013	-0.0304752	-0.0260229	0.482307	-0.308436	-0.346006	-0.631247	0.5444	0.288057	0.368689	-0.167038	0.0838259	-0.523326	0.0607968	0.376401	0.508544	-0.153018	-0.511741	0.529287	0.470936	0.0936646	0.548092	0.00889228	-0.520283	-0.529439	-0.413369	-0.61112	-0.329074	0.287087	-0.255178	-0.125278	-0.153868	-0.1741	0.121916
SHEDDEN_LUNG_CANCER_GOOD_SURVIVAL_A4	1.78564e-08	8.21573e-05	0.300174	0.383477	0.444768	0.184978	0.472823	-0.106967	0.429929	0.233744	0.503214	0.317639	-0.0243088	-0.10999	0.309091	0.336553	0.290831	0.271994	-0.371696	-0.328536	0.211397	-0.0238202	-0.475839	-0.119429	-0.0687394	0.297809	0.40201	0.388115	-0.394283	-0.211749	-0.340509	0.416729	0.245762	0.127616	-0.347019	-0.30922	-0.326265	-0.301395	0.434443	0.179926	0.450995	0.508311	0.400255	-0.0996805	0.220466	-0.330763	0.261261	0.246393	0.158419
CHIANG_LIVER_CANCER_SUBCLASS_PROLIFERATION_DN	2.33416e-08	0.000107372	0.190267	0.187719	0.392057	-0.148917	0.318483	0.0562193	0.26633	-0.190638	0.173164	0.0758887	-0.153642	-0.203397	0.175209	0.289199	0.00510486	-0.0792353	-0.0149733	-0.174875	0.310499	-0.204805	-0.160115	-0.23838	-0.016123	0.142193	0.0951577	0.19303	-0.170555	-0.267239	-0.121559	0.0419879	-0.0128131	0.378102	-0.00863183	-0.12939	-0.111673	-0.302245	0.331384	0.0155088	0.118606	0.285249	0.172524	-0.0445292	-0.0275112	0.0119502	0.186097	0.201973	0.33379
LIAO_METASTASIS	2.96499e-08	0.00013636	-0.0803022	-0.174197	-0.133556	-0.161087	-0.171414	0.0267438	-0.221412	-0.0303677	0.0224837	-0.132873	0.0241754	0.130198	-0.186481	-0.240717	-0.0817968	-0.109614	0.0583139	0.0271204	-0.125937	-0.100478	0.158274	0.170608	-0.0612258	-0.0699494	-0.0558311	-0.151729	0.088802	-0.116542	0.17389	-0.136249	-0.0655886	-0.0709874	0.0503174	0.102043	0.0908475	0.098706	-0.122346	-0.184353	-0.0277417	-0.229146	-0.276427	0.0726735	-0.0106482	-0.0243755	-0.150896	0.0450016	0.0188332
LY_AGING_MIDDLE_DN	3.08442e-08	0.000141822	0.217451	-0.331684	-0.374581	-0.483773	-0.497134	0.3447	-0.432274	-0.576885	-0.482285	-0.68677	0.401362	0.104333	-0.271021	-0.353944	-0.121095	0.158507	0.437772	-0.0124134	-0.0689775	-0.541242	0.479357	0.634815	0.397157	0.547783	0.00467628	-0.634812	0.424641	0.318055	0.689172	-0.553914	-0.0741603	0.49111	0.696829	0.383177	0.675799	0.346521	-0.616499	-0.606397	-0.311614	-0.43361	-0.500267	0.51419	-0.0664272	-0.283237	-0.532979	-0.351778	-0.01012
VANTVEER_BREAST_CANCER_METASTASIS_DN	3.309e-08	0.000152115	-0.0135017	-0.384843	-0.363629	-0.397627	-0.276889	0.268045	-0.358158	-0.127009	-0.211524	-0.377751	0.102793	0.24391	-0.276769	-0.125031	-0.155965	-0.0964251	0.190324	0.0901549	-0.178793	-0.269475	0.289013	0.387721	-0.0250677	0.241466	0.0810941	-0.184905	-0.000887489	0.0947946	0.392713	-0.252438	-0.101562	-0.0839853	0.261598	0.19356	0.170267	0.199827	-0.331922	-0.14257	-0.24134	-0.326687	-0.365054	0.295545	-0.184735	-0.212731	-0.322441	-0.198912	-0.160014
CHEMNITZ_RESPONSE_TO_PROSTAGLANDIN_E2_DN	3.53353e-08	0.000162401	0.114306	0.209753	0.195263	0.258632	0.191212	-0.110545	0.285745	0.27146	0.188886	0.266322	0.118388	0.184337	0.110804	0.0672314	0.161583	0.02507	-0.0965758	0.105927	0.0915257	0.00295305	-0.0884552	-0.0448236	-0.0317939	0.0763373	0.0829901	0.299031	-0.126704	-0.219411	-0.161818	0.18044	0.0794521	-0.126989	-0.269542	-0.0161478	-0.261458	-7.53359e-05	0.245927	0.0782814	0.264458	0.236379	0.188745	-0.14548	0.180777	-0.0788441	-0.0369308	0.24812	0.145131
FERREIRA_EWINGS_SARCOMA_UNSTABLE_VS_STABLE_UP	4.61671e-08	0.000212138	-0.269111	-0.255792	-0.306453	-0.320078	-0.248324	0.0904937	-0.26366	-0.0125934	-0.181137	-0.297468	0.245138	0.0285401	-0.253688	-0.218479	-0.0240285	0.0461787	0.205519	0.0228372	-0.0968165	-0.211422	0.316337	0.258023	0.00928422	0.158149	-0.116278	-0.305541	0.115776	0.192419	0.289365	-0.346636	0.0337027	-0.0232439	0.194645	0.147026	0.279186	0.0965023	-0.354519	-0.211258	-0.280901	-0.355033	-0.300047	0.335927	-0.140904	-0.0626895	-0.273905	-0.119901	0.00805119
FOURNIER_ACINAR_DEVELOPMENT_LATE_DN	6.32462e-08	0.000290553	0.102786	-0.37829	-0.384613	-0.415974	-0.224269	-0.0861284	-0.537183	-0.44799	-0.571902	-0.645562	0.425449	-0.104735	-0.463202	-0.424338	-0.357085	-0.102579	-0.015763	0.194993	0.215906	-0.618298	0.601302	0.34909	0.34403	0.197581	0.0381154	-0.525446	0.475539	0.292746	0.589167	-0.50995	0.114367	0.260119	0.580909	0.128104	0.528073	0.359853	-0.498493	-0.404987	-0.504255	-0.64565	-0.429713	0.393303	-0.209584	-0.118831	-0.579767	-0.0686147	-0.286661
FARMER_BREAST_CANCER_CLUSTER_6	6.87973e-08	0.000315986	0.371531	0.223547	0.46178	0.452217	0.0809626	-0.0505274	0.0686273	0.444485	-0.303704	0.154339	-0.270962	-0.103615	0.174367	0.322323	-0.263817	0.330121	0.259545	-0.257749	0.414376	-0.0187207	-0.459085	0.394769	0.425238	0.410329	0.484799	0.120978	0.356486	-0.385125	0.114141	0.19515	-0.14746	0.0957556	-0.289078	0.0719146	-0.304758	-0.3543	-0.204188	0.348451	0.0373046	0.441354	0.487846	-0.0474915	0.00853145	0.407323	-0.310177	0.5534	0.264192
CHIANG_LIVER_CANCER_SUBCLASS_PROLIFERATION_UP	7.18787e-08	0.000330067	-0.1516	-0.360007	-0.277741	-0.407284	-0.285643	0.0876387	-0.478323	-0.222451	-0.337555	-0.432733	0.285758	0.0446593	-0.364714	-0.30019	-0.177103	-0.110152	0.271533	0.253794	-0.263584	-0.400538	0.414481	0.414713	0.181034	0.333199	0.0324192	-0.454136	0.155617	0.292121	0.464378	-0.319503	0.0776661	0.140308	0.355215	0.146751	0.360711	0.293353	-0.405298	-0.382419	-0.22664	-0.466758	-0.41547	0.318218	-0.0621287	-0.221005	-0.396211	0.0763502	-0.0257638
WIKMAN_ASBESTOS_LUNG_CANCER_UP	7.93185e-08	0.000364151	0.402306	0.473949	0.467728	-0.0606007	0.0795445	-0.0150554	0.397654	0.319769	0.216356	0.207362	-0.188478	0.263175	0.324501	-0.0823617	0.211564	-0.0557565	-0.378562	-0.40721	0.285103	-0.213427	-0.372934	0.243742	0.307714	0.215456	-0.0102502	0.412428	0.089542	-0.400616	-0.131699	0.108609	0.0550107	0.183418	0.210061	-0.11359	0.105674	0.0148245	0.347589	0.259487	0.00678106	0.215901	0.344566	-0.0676938	0.183924	-0.0662581	-0.0209601	0.564818	0.225973
RAMJAUN_APOPTOSIS_BY_TGFB1_VIA_MAPK1_DN	8.26645e-08	0.00037943	0.337223	-0.0863522	-0.693848	-0.14891	-0.46071	0.171696	-0.572128	0.221705	-0.0294286	-0.250308	-0.0215548	-0.520315	-0.0921293	-0.118573	-0.342373	0.0217556	0.422149	-0.0535811	0.354069	0.0734823	-0.108081	0.292402	0.27386	-0.0921298	0.187453	-0.261941	0.497046	0.270983	0.358949	-0.0527249	-0.426143	0.0430633	0.439421	-0.00195965	0.55911	0.442351	-0.578854	-0.0530361	-0.24495	-0.283502	-0.52448	-0.119622	0.0138127	-0.323794	0.265858	-0.261819	-0.505261
SMID_BREAST_CANCER_BASAL_DN	8.62551e-08	0.000395825	0.120481	0.120947	0.246495	0.110432	0.179008	-0.150971	0.17793	0.0846213	0.111217	0.186782	0.0244127	-0.0259879	0.274784	0.115558	-0.00044937	0.023916	-0.00324856	0.00620636	0.189276	-0.202987	-0.153974	0.0164921	-0.0295306	0.0190139	-0.0292464	0.178168	-0.113912	-0.152082	-0.213932	0.170484	0.0632455	0.0293769	-0.229019	-0.0263064	-0.208248	-0.111768	0.224956	0.102106	0.247753	0.133862	0.13424	-0.190623	0.0763393	-0.0951714	0.126773	0.255799	0.151261
SMID_BREAST_CANCER_LUMINAL_A_DN	9.41776e-08	0.000432087	-0.112912	-0.374136	-0.528911	-0.682972	-0.604374	0.464143	-0.560548	-0.351406	-0.445379	-0.673035	0.499104	-0.0132297	-0.623304	-0.529049	-0.342495	0.0274097	0.170692	0.0036009	-0.0843858	-0.477422	0.593555	0.551963	0.100444	0.0963452	0.029022	-0.691998	0.313361	0.074504	0.578583	-0.503092	-0.0919541	0.16896	0.54702	0.127605	0.54388	0.170389	-0.674189	-0.388585	-0.340373	-0.544042	-0.581277	0.622645	-0.224557	-0.230146	-0.512503	-0.170721	-0.0322427
VANTVEER_BREAST_CANCER_POOR_PROGNOSIS	1.01185e-07	0.000464134	-0.119367	-0.384656	-0.283461	-0.557984	-0.422471	0.312866	-0.40008	-0.128657	-0.147704	-0.0905374	-0.164299	0.264375	-0.255475	-0.164121	-0.208968	-0.257133	0.251093	-0.205422	-0.168001	-0.213349	0.207141	0.394714	-0.104735	-0.0164117	-0.0880334	-0.178556	-0.106902	0.0547755	0.229413	-0.101565	-0.0160328	-0.10582	0.0458739	-0.00072063	0.0297463	-0.178216	-0.272766	-0.0317185	-0.181413	-0.336409	-0.351347	0.138234	0.0655605	-0.269942	-0.158597	-0.0569576	0.207324
COLDREN_GEFITINIB_RESISTANCE_UP	1.07044e-07	0.000490902	0.054221	-0.177799	-0.174636	-0.313625	-0.31965	-0.192676	-0.0490917	0.0234672	-0.146501	-0.214573	0.316555	0.0477746	-0.00418975	-0.0843379	-0.207957	-0.221925	-0.174892	-0.248723	0.119313	0.0536883	-0.0311764	0.116281	0.0650105	-0.220952	-0.152962	-0.10471	-0.0353506	0.0826749	0.0835273	0.204893	-0.261705	0.0519401	0.283083	-0.106403	0.226087	-0.0798688	-0.254972	-0.0948758	-0.180508	-0.125961	-0.187784	0.121219	0.0260963	-0.0805531	-0.0231764	-0.288652	-0.309238
BROWNE_HCMV_INFECTION_2HR_DN	1.13837e-07	0.000521944	0.210372	-0.356806	-0.216504	-0.307689	-0.26322	-0.297557	-0.37899	-0.20599	-0.202024	-0.390899	0.193968	-0.248239	-0.206799	-0.0156339	-0.0616328	-0.25901	0.00606034	0.35901	-0.0988447	-0.429919	0.403228	0.145624	0.219244	0.0392716	0.108177	-0.394134	0.154635	0.362816	0.323005	0.00821687	-0.128515	0.262013	0.493014	0.311091	0.459883	0.380827	-0.403729	-0.385727	-0.226636	-0.516546	-0.408011	-0.0570662	-0.15018	-0.333386	-0.0953455	0.110655	0.00251685
MONTERO_THYROID_CANCER_POOR_SURVIVAL_UP	1.14944e-07	0.000526904	-0.434294	-0.581497	-0.460304	-0.523549	-0.526727	0.337815	-0.747233	-0.388615	-0.349356	-0.694297	0.364132	0.433974	-0.627119	-0.553198	-0.104243	-0.102561	0.328188	0.14459	-0.32645	-0.65822	0.68429	0.473013	0.223545	0.317685	-0.046138	-0.640681	0.306207	0.513683	0.698002	-0.681028	-0.151614	0.00185863	0.714937	0.428265	0.680227	0.377368	-0.646153	-0.548898	-0.331201	-0.617607	-0.693796	0.679203	0.157122	-0.147611	-0.737643	0.154772	-0.151424
XU_HGF_SIGNALING_NOT_VIA_AKT1_48HR_DN	1.20961e-07	0.000554366	-0.204418	-0.139449	-0.20985	-0.44016	-0.102074	0.0618139	-0.192957	-0.134277	-0.449323	-0.404498	0.315431	0.334159	-0.022791	-0.180979	-0.23557	-0.209245	0.466201	-0.319146	-0.181153	-0.523145	0.544364	0.232911	0.0898787	0.454699	-0.0412684	-0.224729	0.0767051	0.391079	0.411727	0.000979477	-0.403995	0.0900777	0.354977	0.243882	0.274724	-0.0915248	-0.498883	-0.15041	-0.108834	-0.234639	-0.369004	0.344268	0.0174824	-0.0149549	-0.169618	-0.0722931	-0.20872
KONG_E2F3_TARGETS	1.26301e-07	0.000578711	-0.155872	-0.341073	-0.374889	-0.442165	-0.410114	0.405524	-0.498092	-0.402946	-0.346852	-0.570865	0.383586	-0.0146602	-0.345696	-0.372695	0.0306668	0.134922	0.345496	-0.143038	-0.28131	-0.43451	0.475142	0.418967	0.171634	0.443219	0.00672647	-0.545603	0.256368	0.302504	0.566342	-0.512713	-0.0943335	0.318556	0.502504	0.41001	0.496832	0.368677	-0.451113	-0.435198	-0.437715	-0.463641	-0.502308	0.502379	-0.0964049	-0.183645	-0.503112	-0.178309	0.0414682
VANTVEER_BREAST_CANCER_METASTASIS_UP	1.30249e-07	0.000596672	0.294797	0.297375	0.179864	-0.114012	0.187216	0.0576338	-0.168941	0.0112715	-0.169569	0.191308	-0.198146	-0.113318	-0.128874	0.0237697	-0.0274775	-0.0995219	-0.0878688	-0.13024	0.393048	-0.257665	-0.111588	0.0023903	0.219346	0.0355256	-0.0424191	-0.0308808	0.148853	-0.0541394	-0.133064	-0.138965	0.00132076	0.222129	0.126104	-0.0374419	-0.0403624	-0.128701	-0.250172	0.246854	0.0186654	0.208136	0.0857316	-0.236836	-0.0659079	-0.0642366	0.0368485	0.185734	0.236932
KUMAMOTO_RESPONSE_TO_NUTLIN_3A_DN	1.37199e-07	0.000628372	-0.426243	-0.497558	-0.616402	-0.644297	-0.169499	0.262565	-0.503337	-0.608437	-0.573904	-0.778647	0.244319	0.349592	-0.219197	-0.302507	-0.201955	-0.250296	0.620453	-0.0284158	-0.0139491	-0.633818	0.515708	0.546938	0.370519	0.683885	0.128819	-0.757146	0.372909	0.375668	0.709281	-0.68433	-0.265008	0.607857	0.656831	0.464118	0.674005	0.141333	-0.807506	-0.633963	-0.353283	-0.669266	-0.590576	0.580531	-0.296711	-0.292761	-0.474109	-0.384982	0.0391911
REACTOME_RNA_POL_I_PROMOTER_OPENING	1.89527e-07	0.000867846	-0.391769	-0.261353	0.217899	-0.0373063	-0.0542011	-0.191389	-0.602871	-0.399318	-0.57297	-0.614564	0.287808	-0.31129	0.288517	0.0399886	-0.00783251	0.425312	0.123685	0.241548	0.0631042	-0.644134	0.674156	0.531399	0.585405	0.408965	0.367738	-0.556589	0.331771	0.603551	0.534325	-0.567279	-0.497612	0.442377	0.541923	0.509808	0.537726	0.54587	-0.564575	-0.537904	-0.553812	-0.369962	0.420679	0.367824	-0.505022	-0.181654	-0.439742	-0.0523112	0.158057
REACTOME_MEIOTIC_SYNAPSIS	1.94111e-07	0.00088864	-0.317571	-0.181517	0.00832266	0.0272446	-0.0900018	-0.0502359	-0.32338	-0.292621	-0.352518	-0.375617	0.255631	-0.190484	0.162712	-0.0672119	-0.0645418	0.209732	0.13889	0.0341172	-0.172666	-0.515389	0.485306	0.411393	0.326987	0.303275	0.19227	-0.271541	0.155763	0.473651	0.436738	-0.410505	-0.434599	0.285797	0.368362	0.301166	0.233863	0.46348	-0.435955	-0.262413	-0.312928	-0.301557	0.240011	0.217224	-0.382268	-0.027256	-0.22549	0.0856725	0.232091
REACTOME_DEPOSITION_OF_NEW_CENPA_CONTAINING_NUCLEOSOMES_AT_THE_CENTROMERE	1.98943e-07	0.000910563	-0.362274	-0.248546	0.118751	-0.0540062	-0.168501	0.132606	-0.483122	-0.401743	-0.492877	-0.567787	0.334248	-0.158868	0.0974043	0.00208649	0.172923	0.399982	0.119561	0.0173636	0.0566941	-0.471533	0.559156	0.505891	0.473359	0.443257	0.25301	-0.458586	0.249984	0.57695	0.553367	-0.567771	-0.326445	0.451429	0.560589	0.478898	0.497762	0.414694	-0.535346	-0.463476	-0.505825	-0.362992	0.124671	0.460377	-0.464614	0.0204331	-0.464631	-0.0955143	0.135641
ZHOU_CELL_CYCLE_GENES_IN_IR_RESPONSE_24HR	2.08965e-07	0.000956222	-0.141531	-0.271309	-0.338207	-0.421086	-0.351498	0.305224	-0.474276	-0.373799	-0.364396	-0.520868	0.365105	-0.113431	-0.398402	-0.349815	-0.15352	0.0903091	0.327344	0.00182301	-0.127567	-0.481001	0.447982	0.337756	0.342041	0.466522	0.0187111	-0.543656	0.326344	0.375054	0.547747	-0.506581	-0.181729	0.327898	0.542212	0.389597	0.540433	0.251344	-0.495811	-0.488764	-0.443698	-0.419166	-0.428384	0.496931	-0.141071	-0.280499	-0.454905	-0.0947351	0.0560765
DOANE_BREAST_CANCER_CLASSES_UP	2.09997e-07	0.000960735	0.361738	0.259128	0.465201	0.302771	0.376644	0.0934211	0.131745	-0.0196943	-0.00237691	0.168038	-0.161131	-0.130001	0.136351	0.0533662	0.193169	0.238561	0.107314	-0.0507521	0.396321	-0.370817	-0.299296	0.203443	0.276309	0.37626	0.410237	0.181694	0.142698	-0.169278	0.00929008	0.18739	0.138616	0.168602	-0.23737	-0.13772	-0.266618	-0.276148	0.0284706	-0.0106887	0.260802	0.190416	0.332492	-0.111588	0.306888	-0.116507	0.0465688	0.399763	0.252874
INAMURA_LUNG_CANCER_SCC_UP	2.30106e-07	0.0010525	0.24499	-0.219493	-0.508151	-0.271724	-0.57449	-0.216449	-0.163628	0.140247	-0.496787	-0.502567	-0.0933576	0.457145	-0.567306	-0.515067	-0.181032	-0.222415	-0.110717	0.601536	-0.291453	-0.411209	0.553161	0.0177336	-0.207693	0.370788	0.245441	-0.486699	0.155381	0.157701	0.316235	-0.423005	-0.0555044	-0.176865	0.160655	0.24995	0.248151	0.502147	-0.618155	-0.535036	0.21075	-0.62631	-0.463382	0.46583	-0.0050545	-0.610555	-0.515063	-0.0327635	-0.39106
KEGG_PRIMARY_BILE_ACID_BIOSYNTHESIS	2.39368e-07	0.00109463	0.190369	-0.153002	0.62972	0.478092	0.524776	-0.19991	0.467493	-0.237428	0.539039	0.206586	-0.448754	-0.11891	0.316325	0.608251	0.398603	0.416675	0.327755	-0.429082	0.382215	-0.204446	-0.350823	-0.664919	0.476633	0.459306	0.300222	0.46996	0.163104	0.0710519	-0.295739	-0.0355068	0.390414	0.624842	0.0287592	-0.506073	0.210544	-0.652133	0.0804206	0.371281	0.143259	0.132299	0.0492203	-0.326956	0.362006	-0.125068	-0.0216926	0.371961	0.370731
LEE_EARLY_T_LYMPHOCYTE_UP	2.44022e-07	0.00111567	-0.205008	-0.448569	-0.308013	-0.454551	-0.249415	0.264355	-0.552342	-0.309185	-0.29801	-0.469925	0.33372	0.0523373	-0.341186	-0.317873	-0.133118	0.177209	0.413242	0.12482	-0.142653	-0.466822	0.405181	0.427975	0.202579	0.469083	-0.00364285	-0.500367	0.285086	0.246066	0.515177	-0.402072	0.050408	0.330909	0.466283	0.368967	0.452309	0.322552	-0.499281	-0.375147	-0.273161	-0.455942	-0.396909	0.484131	-0.0152319	0.0491465	-0.461395	-0.061909	-0.0907507
FLORIO_NEOCORTEX_BASAL_RADIAL_GLIA_DN	2.53151e-07	0.00115715	-0.263964	-0.4082	-0.325515	-0.406051	-0.355576	0.179833	-0.444264	-0.424391	-0.311309	-0.524589	0.414272	0.0391039	-0.304571	-0.302555	-0.0152577	-0.0674505	0.443169	-0.0237776	-0.322908	-0.482531	0.423776	0.281578	0.163961	0.357503	-0.000298635	-0.483657	0.198581	0.305677	0.449806	-0.328416	-0.0262325	0.207885	0.403574	0.255716	0.386482	0.283247	-0.465558	-0.406198	-0.385412	-0.480018	-0.397063	0.469613	-0.00509043	-0.225197	-0.391395	-0.0109739	0.0105795
CHEMNITZ_RESPONSE_TO_PROSTAGLANDIN_E2_UP	2.77682e-07	0.00126901	-0.187282	-0.367617	-0.324516	-0.35268	-0.336901	0.292927	-0.486251	-0.338155	-0.301077	-0.425622	0.234484	0.0628834	-0.397456	-0.364396	-0.0597283	-0.104576	0.199926	0.0705772	-0.17695	-0.152874	0.407872	0.403831	0.129758	0.267122	-0.010032	-0.410853	0.170705	0.171576	0.435529	-0.229027	0.0897283	0.10409	0.459621	0.0348652	0.450704	0.0460868	-0.368119	-0.277023	-0.379001	-0.387859	-0.392913	0.432595	0.00857752	-0.0913848	-0.32048	-0.220555	-0.239259
CHIANG_LIVER_CANCER_SUBCLASS_CTNNB1_UP	2.9358e-07	0.00134137	-0.0679318	0.010231	0.228383	-0.059215	0.161664	0.139827	0.18795	0.0709756	0.117578	0.0748347	0.159939	-0.00589163	0.248684	0.267844	-0.0106208	-0.155084	0.0894986	0.0981409	0.0231756	-0.0727335	-0.100664	-0.115695	-0.199709	0.049621	-0.0304202	0.330189	-0.301125	-0.280745	-0.228289	0.170004	0.0363274	-0.0178338	-0.147791	-0.0310491	-0.198749	-0.209953	0.152944	0.0745321	0.28681	0.170576	-0.0517441	-0.0320452	0.115093	0.0867816	0.195244	0.188237	0.15463
RODRIGUES_THYROID_CARCINOMA_ANAPLASTIC_DN	3.18608e-07	0.0014554	-0.063477	0.0537414	0.156644	0.157883	0.292579	-0.0173878	0.241925	0.125293	0.185082	0.236055	0.103478	0.0430363	0.295225	0.16166	-0.0237853	-0.10395	-0.0798704	-0.0145293	-0.0416059	0.119672	-0.167967	-0.0584633	-0.233131	0.0225104	-0.180801	0.329269	-0.263171	-0.182871	-0.362035	0.259196	0.0433438	-0.0998902	-0.349855	-0.0873002	-0.330186	-0.0847345	0.238026	0.25903	0.21154	0.200908	0.0240154	-0.119977	0.0678743	0.0407296	0.186354	0.0274907	0.0110384
REACTOME_MEIOSIS	3.24614e-07	0.00148251	-0.295939	-0.249908	0.0176881	-0.00197866	-0.141706	-0.0496363	-0.338922	-0.296503	-0.35046	-0.382987	0.233545	-0.142105	0.060236	-0.0866682	-0.044803	0.236797	0.0607092	0.124119	-0.13378	-0.448964	0.468843	0.382305	0.312862	0.261188	0.148058	-0.376514	0.153684	0.425489	0.418101	-0.452011	-0.400899	0.254088	0.368673	0.374366	0.27651	0.447293	-0.427605	-0.230307	-0.366368	-0.315614	0.180153	0.258052	-0.310322	-0.079058	-0.316152	0.120556	0.199881
REACTOME_CHROMOSOME_MAINTENANCE	3.2658e-07	0.00149116	-0.280591	-0.144704	-0.132464	-0.140944	-0.196541	0.131051	-0.308198	-0.357972	-0.375924	-0.380466	0.242346	-0.102263	-0.120325	-0.203223	0.0322677	0.0958927	0.197336	-0.00968703	-0.159829	-0.369667	0.404992	0.376683	0.296156	0.332549	0.0819836	-0.396595	0.139187	0.399923	0.461202	-0.469859	-0.32187	0.236179	0.417506	0.314402	0.359149	0.360171	-0.422253	-0.309472	-0.382319	-0.320758	-0.0777184	0.335427	-0.282559	-0.0826465	-0.354881	0.0179603	0.177716
XU_HGF_TARGETS_INDUCED_BY_AKT1_48HR_DN	3.44909e-07	0.00157451	-0.347323	-0.186144	-0.321228	-0.163465	-0.0155467	0.279815	-0.00187817	-0.112503	0.266164	-0.240163	0.386521	-0.399259	0.156781	0.0720183	-0.204007	-0.0422312	0.263031	0.296771	-0.210019	-0.322211	0.309537	0.39891	-0.199317	0.097692	-0.315767	0.157921	-0.0639358	0.122028	0.346001	0.1048	-0.428023	-0.0481363	0.149166	0.209009	0.183793	0.337631	-0.0987695	-0.200473	-0.0801621	-0.375855	-0.302387	0.414843	-0.122664	0.19485	-0.300703	-0.261594	-0.389912
SHEDDEN_LUNG_CANCER_POOR_SURVIVAL_A6	3.5523e-07	0.00162127	-0.0880697	-0.274359	-0.319159	-0.360651	-0.292867	0.311346	-0.466477	-0.2223	-0.3652	-0.463889	0.305591	-0.0517973	-0.418953	-0.258446	-0.00286859	-0.0532822	0.126094	0.0628684	0.0153225	-0.358187	0.406894	0.394478	0.209292	0.351196	0.140595	-0.426405	0.319454	0.281152	0.518053	-0.397619	-0.202839	0.189312	0.462141	0.246602	0.46759	0.354613	-0.469865	-0.323973	-0.40988	-0.405795	-0.383025	0.394047	-0.127535	-0.16672	-0.38922	-0.182198	-0.156674
REACTOME_RNA_POL_I_RNA_POL_III_AND_MITOCHONDRIAL_TRANSCRIPTION	3.62731e-07	0.00165514	-0.159966	-0.0727602	-0.0207026	0.0136804	-0.0649283	0.00595595	-0.319726	-0.164932	-0.369912	-0.410043	0.158002	-0.21476	0.0331332	-0.189784	-0.0048191	0.188012	-0.0188549	0.0797813	0.210367	-0.320312	0.481127	0.361714	0.392907	0.120562	0.175921	-0.282776	0.194265	0.257942	0.333476	-0.448941	-0.279296	0.104058	0.374294	0.312359	0.355856	0.397097	-0.395844	-0.321294	-0.407088	-0.242142	0.0669618	0.161406	-0.330737	-0.184503	-0.26319	-0.208039	0.0201746
ZHAN_MULTIPLE_MYELOMA_PR_UP	3.73648e-07	0.00170458	-0.0151297	-0.344101	-0.432024	-0.424261	-0.455859	0.451752	-0.597918	-0.433823	-0.316525	-0.581209	0.4996	-0.0619236	-0.389073	-0.47386	0.00223209	0.208289	0.431649	0.109912	-0.121375	-0.624905	0.587353	0.507367	0.267085	0.574814	0.163645	-0.591304	0.448609	0.417067	0.643105	-0.51291	0.120278	0.237513	0.632201	0.452615	0.559072	0.423234	-0.494738	-0.519098	-0.500472	-0.540083	-0.450155	0.629298	-0.294838	-0.300601	-0.587875	-0.112517	-0.199797
CROONQUIST_NRAS_VS_STROMAL_STIMULATION_DN	3.76974e-07	0.00171938	-0.129164	-0.464977	-0.0511114	-0.534023	-0.398167	-0.120172	-0.395788	-0.441983	-0.421758	-0.370246	0.34745	-0.0208474	-0.0928985	-0.188303	-0.28514	-0.138919	0.243541	-0.192166	-0.0205695	-0.411376	0.362301	0.011494	0.310855	0.181225	-0.134138	-0.468498	0.0714789	0.49187	0.337733	-0.0282876	-0.326106	0.261301	0.360565	-0.131028	0.361247	-0.0848325	-0.40618	-0.364104	-0.258645	-0.409827	-0.412986	0.284962	-0.0272635	-0.282367	-0.131069	-0.0313537	-0.007509
REICHERT_MITOSIS_LIN9_TARGETS	3.9109e-07	0.00178337	-0.362868	-0.453566	-0.351339	-0.571449	-0.319289	0.331059	-0.248038	-0.301383	-0.260255	-0.573057	0.261921	0.189867	-0.510465	-0.375281	-0.209725	-0.0390397	0.343844	0.0183328	-0.372183	-0.443767	0.567358	0.557045	0.150016	0.382704	-0.0576292	-0.463347	0.170835	0.383915	0.638435	-0.441466	-0.017431	0.224054	0.453899	0.425793	0.353802	0.40103	-0.434442	-0.338568	-0.320313	-0.534873	-0.52095	0.349271	0.111931	-0.0473614	-0.645701	-0.0281484	-0.139135
SMID_BREAST_CANCER_RELAPSE_IN_BONE_UP	4.43981e-07	0.00202411	0.301218	0.369499	0.216827	0.14177	0.157878	-0.0444563	0.141817	0.364149	0.305689	0.299277	0.301903	-0.10344	0.281228	0.324425	0.148455	0.192021	0.179181	-0.0271437	0.325209	-0.248182	-0.242578	0.428529	0.20968	0.204392	0.216108	0.171114	0.10627	-0.176161	-0.16671	0.211633	0.0650776	0.0747315	-0.218597	-0.0797657	-0.319952	-0.252609	0.332603	0.216915	0.425831	0.249154	0.229289	-0.282542	0.227263	-0.172612	0.0778039	0.301107	0.197425
JI_CARCINOGENESIS_BY_KRAS_AND_STK11_UP	4.80786e-07	0.00219142	-0.384217	-0.542874	-0.112966	0.530749	-0.444203	-0.728892	-0.514523	0.134214	-0.0166565	-0.016268	-0.126376	0.133866	0.229522	-0.213584	-0.155891	0.315939	-0.543797	0.738784	-0.505637	-0.713275	0.459585	-0.438057	0.0901204	-0.333442	-0.412071	-0.00466365	-0.297795	0.203745	-0.229999	-0.26658	-0.178394	0.0856792	0.155051	0.497215	0.173235	0.435926	-0.521671	-0.531	0.494477	-0.521293	-0.314824	-0.384802	0.391068	-0.471053	0.144113	0.538396	-0.0164665
ODONNELL_TFRC_TARGETS_DN	4.99528e-07	0.00227635	-0.278148	-0.372918	-0.266854	-0.31214	-0.281535	0.240629	-0.393492	-0.231203	-0.315773	-0.502125	0.264361	-0.073097	-0.28963	-0.19882	-0.114052	0.125629	0.249835	0.0495944	-0.26872	-0.407814	0.312925	0.425145	0.0782827	0.290022	-0.0681718	-0.327224	0.257626	0.182127	0.467373	-0.379176	-0.0195046	0.215379	0.402118	0.403242	0.406044	0.354759	-0.405123	-0.399272	-0.355437	-0.231784	-0.349314	0.388607	-0.00792771	-0.227647	-0.412792	-0.103194	0.0428187
GAVIN_FOXP3_TARGETS_CLUSTER_P6	5.23903e-07	0.0023869	-0.0323581	-0.353907	-0.299537	-0.363211	-0.286112	0.412729	-0.418429	-0.392752	-0.224336	-0.439309	0.346754	-0.100143	-0.138491	-0.125576	-0.150457	0.200866	0.347257	-0.211287	0.0382458	-0.432987	0.395104	0.297813	0.31019	0.453369	-0.0122389	-0.480916	0.316363	0.334812	0.526406	-0.309486	-0.0309122	0.36905	0.428993	0.174747	0.443719	0.116541	-0.493548	-0.343018	-0.278028	-0.44651	-0.326098	0.473936	-0.00305816	0.0854984	-0.186112	-0.11156	-0.0508474
SARRIO_EPITHELIAL_MESENCHYMAL_TRANSITION_UP	5.32232e-07	0.00242432	-0.0629094	-0.230441	-0.231479	-0.377894	-0.279233	0.280039	-0.457045	-0.308241	-0.349834	-0.486725	0.391403	-0.0963925	-0.352528	-0.334912	0.111726	0.103863	0.263629	-0.0555007	0.00460753	-0.43195	0.42077	0.266696	0.304415	0.392393	0.179872	-0.501099	0.258193	0.398543	0.502482	-0.360698	-0.00897345	0.329023	0.535594	0.054038	0.502533	0.162694	-0.474317	-0.45077	-0.404634	-0.426254	-0.360562	0.372782	-0.0972406	-0.131647	-0.401575	-0.0903354	-0.0683001
AMUNDSON_GAMMA_RADIATION_RESPONSE	5.49213e-07	0.00250111	-0.0390114	-0.45504	-0.410996	-0.453391	-0.490131	0.373997	-0.482683	-0.478183	-0.408742	-0.614597	0.335406	-0.0243363	-0.465184	-0.506623	0.00741501	-0.0513865	0.465361	0.0580193	-0.0802831	-0.629676	0.500298	0.541298	0.379492	0.586363	0.2614	-0.505787	0.296954	0.337096	0.676441	-0.547023	-0.085545	0.172844	0.549511	0.297949	0.51951	0.131428	-0.544375	-0.490499	-0.449912	-0.437124	-0.500725	0.309915	-0.116856	-0.122986	-0.581064	-0.0129788	0.130374
YEGNASUBRAMANIAN_PROSTATE_CANCER	5.7867e-07	0.00263469	0.165789	0.0683236	0.133971	0.177422	0.214608	0.271008	0.179544	0.106684	-0.0848733	-0.00346163	0.122087	-0.00641404	0.0403343	0.13451	0.277244	0.155733	-0.00966023	0.108845	0.255224	-0.0751893	-0.166735	0.225325	0.199552	0.324581	0.269948	0.287004	0.0954404	-0.193638	0.15665	0.156529	0.00238118	0.124773	0.0911023	-0.0112981	0.0666961	-0.132308	0.0332842	0.193876	0.157318	0.289735	0.166726	0.0413508	0.257171	-0.0446608	-0.199348	0.0935544	0.154148
SHETH_LIVER_CANCER_VS_TXNIP_LOSS_PAM4	5.92214e-07	0.00269576	0.00240003	-0.019499	0.138486	-0.0559013	-0.139652	0.00555576	-0.0651715	-0.108621	0.0455405	-0.0906988	-0.188292	-0.0794336	0.0864267	0.229229	0.0180813	0.10476	0.0426597	-0.247182	0.134769	0.0228671	-0.0493332	0.000354832	0.00493463	0.0637686	-0.100325	-0.0846738	-0.0201295	-0.0617256	-0.102792	0.024444	-0.0772156	0.146564	0.0721393	-0.0858228	0.012221	-0.204212	0.00168591	-0.057411	0.0602299	0.0978571	0.0205974	0.0485954	0.00926932	-0.0428839	0.0485052	0.0820401	0.210673
TANG_SENESCENCE_TP53_TARGETS_DN	6.1364e-07	0.00279267	-0.215333	-0.48587	-0.4315	-0.429073	-0.406106	0.254003	-0.505119	-0.409152	-0.417335	-0.535457	0.196325	-0.00462835	-0.352964	-0.271408	-0.175478	0.0182843	0.282913	0.132839	-0.347535	-0.429905	0.503607	0.444193	0.247449	0.468433	0.166042	-0.515559	0.170728	0.360294	0.543673	-0.405907	-0.0146956	0.293963	0.541779	0.252223	0.488014	0.215934	-0.486459	-0.421276	-0.298975	-0.524789	-0.445877	0.245647	0.0059848	-0.237621	-0.416384	0.0816936	0.0745755
REACTOME_MEIOTIC_RECOMBINATION	6.23293e-07	0.00283598	-0.365006	-0.314592	0.219279	-0.0175823	-0.176715	-0.10006	-0.526346	-0.351997	-0.495742	-0.519023	0.275046	-0.240256	0.0672112	-0.0785208	0.0202545	0.388209	0.0257919	0.181296	0.0187179	-0.511337	0.578278	0.450095	0.476626	0.3489	0.204093	-0.519529	0.242803	0.503733	0.471099	-0.555985	-0.398637	0.355156	0.515081	0.49773	0.449569	0.461018	-0.51149	-0.410677	-0.526521	-0.362109	0.238738	0.406601	-0.36907	-0.140061	-0.463633	0.0580307	0.136759
REACTOME_AMYLOIDS	6.2491e-07	0.00284272	-0.369063	-0.167076	0.238389	0.00296323	-0.0643126	-0.227619	-0.601825	-0.444658	-0.533008	-0.608647	0.174927	-0.337451	0.303641	0.189573	0.0324657	0.355783	0.12578	0.223787	0.189198	-0.678093	0.60924	0.3522	0.587814	0.38583	0.351482	-0.544257	0.28197	0.650846	0.527112	-0.503601	-0.52467	0.471695	0.545493	0.384555	0.52397	0.366122	-0.523984	-0.520039	-0.500776	-0.33546	0.347501	0.296316	-0.459996	-0.184176	-0.343892	-0.0316786	0.151403
REACTOME_RNA_POL_I_TRANSCRIPTION	6.25854e-07	0.00284638	-0.235945	-0.206681	0.0410547	-0.0176046	-0.0845714	-0.0799538	-0.399232	-0.217526	-0.481754	-0.482595	0.249269	-0.30642	0.150139	-0.116367	0.0765278	0.307454	0.0897835	0.159748	0.123231	-0.472494	0.569765	0.455357	0.481312	0.240495	0.248428	-0.407414	0.282427	0.456545	0.42275	-0.508487	-0.362238	0.219479	0.468065	0.426123	0.478774	0.473565	-0.430367	-0.37404	-0.429992	-0.296104	0.230682	0.230772	-0.396283	-0.121234	-0.298906	-0.140434	0.0304909
REACTOME_PACKAGING_OF_TELOMERE_ENDS	6.55131e-07	0.00297888	-0.39622	-0.295107	0.188571	0.0534678	-0.040603	-0.165012	-0.551996	-0.404971	-0.520715	-0.583087	0.212787	-0.274615	0.221519	0.0710342	0.00100103	0.444808	0.0297437	-0.0683289	0.0520336	-0.584052	0.667494	0.545623	0.555922	0.409734	0.29556	-0.442835	0.293841	0.608925	0.474041	-0.514744	-0.437485	0.467848	0.562565	0.291773	0.480288	0.399225	-0.520257	-0.462969	-0.546032	-0.361406	0.397413	0.332442	-0.472344	0.00498999	-0.437665	-0.0177916	0.210767
LI_WILMS_TUMOR_ANAPLASTIC_UP	6.95705e-07	0.00316268	-0.108272	-0.319331	-0.362945	-0.525951	-0.248317	0.256656	-0.48191	-0.221445	-0.0644148	-0.450882	0.177836	-0.114899	-0.24771	-0.417336	-0.127406	-0.26239	0.0642955	-0.268233	-0.128898	-0.498563	0.462512	0.30557	0.000846939	0.421152	-0.0504359	-0.408815	0.0120223	0.220954	0.561937	-0.43861	-0.293175	0.159553	0.435406	0.4553	0.36804	0.501985	-0.343628	-0.315296	-0.366983	-0.530059	-0.472865	0.61607	-0.137094	-0.291435	-0.475681	-0.0345469	0.0443966
SHEPARD_BMYB_TARGETS	7.49197e-07	0.0034051	-0.0672418	-0.305926	-0.266335	-0.308138	-0.188132	0.315582	-0.402275	-0.284561	-0.352777	-0.563593	0.0558215	-0.0750244	-0.272216	-0.296379	0.0226252	0.135389	0.237408	0.127485	-0.176102	-0.536928	0.423062	0.375409	-0.0994752	0.287576	0.226639	-0.360741	0.278393	0.261955	0.507733	-0.312088	0.178818	0.219316	0.487956	0.226544	0.438575	0.22184	-0.488664	-0.34879	-0.275044	-0.31258	-0.392244	0.324602	0.0780029	-0.306489	-0.360396	0.044904	-0.0164162
FRASOR_RESPONSE_TO_SERM_OR_FULVESTRANT_DN	7.81623e-07	0.00355169	-0.103669	-0.352659	-0.394139	-0.502238	-0.50773	0.15162	-0.490572	-0.281058	-0.326512	-0.523511	0.17686	-0.042653	-0.482713	-0.545947	-0.0893496	-0.190208	0.257536	0.080941	-0.147953	-0.44688	0.4563	0.348609	0.171484	0.186095	0.132562	-0.550459	0.452395	0.152703	0.611162	-0.461715	0.0731122	0.287403	0.551802	0.323224	0.502844	0.196212	-0.500451	-0.485143	-0.40334	-0.490176	-0.5358	0.435206	-0.298737	-0.356	-0.390311	0.012599	-0.0837353
VANTVEER_BREAST_CANCER_ESR1_DN	8.09463e-07	0.00367739	-0.0884056	-0.321752	-0.136116	-0.0987993	-0.214437	-0.0867342	-0.335931	0.0242685	-0.260392	-0.179323	0.224027	0.0744061	-0.153951	0.111377	-0.132028	-0.119257	0.0528433	0.0977496	0.025248	-0.13803	0.269995	-0.0609684	0.115849	0.237164	0.102183	-0.200818	0.0358736	0.290284	0.281181	0.105093	-0.0822751	0.0706215	0.329453	0.00813716	0.331635	0.0776596	-0.31212	-0.0285493	0.095464	-0.36781	-0.215011	0.0740498	-0.159366	-0.137457	-0.0344095	-0.120655	-0.180656
YANG_BREAST_CANCER_ESR1_LASER_UP	8.13439e-07	0.00369464	0.0201782	0.434692	-0.105993	0.0646335	-0.287036	-0.290218	-0.128979	-0.0313803	-0.0181139	-0.0636171	-0.174576	-0.00111997	0.443374	-0.283854	-0.0093436	-0.0939277	-0.297452	-0.0370939	0.493839	-0.186869	-0.192171	-0.120483	0.0739963	-0.136395	-0.0413996	-0.296049	0.234161	0.0615759	-0.238165	-0.273669	0.0384102	0.116818	0.0308078	0.142041	0.0873057	-0.296414	-0.188392	0.00126076	-0.242854	0.116379	0.098403	-0.193465	0.218932	0.114513	-0.203719	0.059939	0.217813
ODONNELL_TARGETS_OF_MYC_AND_TFRC_DN	8.46643e-07	0.00384461	-0.269549	-0.345931	-0.301803	-0.367674	-0.429435	0.336632	-0.411788	-0.371347	-0.373232	-0.503002	0.31591	-0.0903988	-0.323817	-0.0302368	-0.146842	0.0591705	0.289835	-0.00416127	-0.211643	-0.461703	0.32657	0.436805	0.148663	0.459317	0.0516694	-0.45508	0.237453	0.172971	0.522413	-0.525427	0.00868296	0.349227	0.447266	0.507463	0.491627	0.314998	-0.471498	-0.446861	-0.447908	-0.226176	-0.373719	0.43473	-0.0426418	-0.192565	-0.442311	-0.148855	0.219708
WOO_LIVER_CANCER_RECURRENCE_DN	8.75033e-07	0.00397265	0.209104	0.300926	0.308616	-0.174683	0.201827	0.0989817	0.188432	0.0351683	-0.297239	-0.207939	-0.228822	-0.415052	-0.0606948	0.442918	-0.0578027	-0.0625747	-0.164239	-0.271561	0.464826	-0.361375	-0.145726	-0.15449	0.213224	0.234918	0.300895	0.011267	0.0989741	-0.172406	-0.129859	-0.100557	-0.140381	0.364348	0.261979	-0.218941	0.289054	-0.0425956	0.101322	0.0097366	-0.173319	0.426643	0.191447	-0.142958	-0.167274	-0.264501	-0.00985813	0.218884	0.221306
REACTOME_THE_ACTIVATION_OF_ARYLSULFATASES	8.75311e-07	0.00397304	0.143848	0.0857177	0.408559	0.298093	0.29741	-0.094628	0.559362	0.363868	0.0650752	0.225218	0.12035	0.580889	-0.401244	0.42098	0.478066	0.415168	-0.468167	-0.493422	0.309307	0.323399	-0.393509	-0.298036	0.145357	-0.0508787	0.153871	0.213142	0.383187	0.197492	0.103476	-0.270184	0.088239	0.368289	-0.0362352	-0.237874	-0.0429171	-0.543923	-0.328348	0.421865	0.147744	0.16237	0.0634674	-0.372898	0.402955	-0.0105042	0.391992	0.393149	0.362373
WU_APOPTOSIS_BY_CDKN1A_VIA_TP53	8.85884e-07	0.00402014	-0.153463	-0.411022	-0.439139	-0.455458	-0.484648	0.402602	-0.503744	-0.300878	-0.245284	-0.622804	0.390448	0.062836	-0.409777	-0.423992	0.0239348	0.145434	0.417073	-0.13971	-0.178967	-0.393393	0.468697	0.387897	0.337212	0.527872	0.208387	-0.533293	0.420208	0.485506	0.643831	-0.461722	-0.0626363	0.371132	0.538691	0.240228	0.565639	0.269081	-0.494351	-0.415171	-0.44273	-0.57646	-0.376778	0.438414	-0.219774	-0.348235	-0.447071	-0.210202	-0.0763565
CHEN_ETV5_TARGETS_TESTIS	9.69199e-07	0.00439726	-0.426375	-0.113108	-0.38912	-0.0871824	-0.310749	0.344869	-0.314415	-0.184558	-0.409233	-0.565049	0.337061	-0.298941	-0.389846	-0.0722135	-0.249965	0.316343	0.0524988	-0.184899	-0.539955	-0.437973	0.319876	0.515262	0.0150354	0.257079	-0.397904	-0.518181	-0.00134842	0.0944459	0.366932	-0.543235	-0.235447	-0.0526252	0.37812	0.344656	0.223223	0.453125	-0.571798	-0.545202	-0.63853	-0.370996	-0.426118	0.438948	-0.449706	0.370272	-0.544069	-0.212011	0.280347
LU_TUMOR_ANGIOGENESIS_UP	1.06677e-06	0.00483888	-0.368968	-0.54225	-0.503714	-0.36583	-0.538521	-0.278204	-0.475353	-0.237109	-0.192824	-0.0911431	0.0298506	-0.0591103	-0.00532963	-0.271874	-0.466746	-0.343926	0.0262364	0.226669	-0.358111	-0.0308166	0.329569	0.0710366	-0.160019	-0.151061	-0.267039	-0.111712	-0.378943	0.219858	-0.20042	0.209093	-0.250521	-0.249909	-0.236203	0.0883348	-0.161017	-0.152267	-0.337858	-0.197113	0.264809	-0.582251	-0.538783	-0.00506636	0.131316	-0.301045	0.100042	-0.113295	-0.246036
CROONQUIST_IL6_DEPRIVATION_DN	1.13533e-06	0.0051487	-0.210241	-0.320153	-0.374179	-0.484321	-0.363287	0.367872	-0.454691	-0.407649	-0.377489	-0.487058	0.355743	-0.127333	-0.419434	-0.372682	0.0650489	0.170112	0.350876	-0.021235	-0.191061	-0.479706	0.485103	0.348	0.348491	0.459137	-0.0697503	-0.582554	0.303462	0.291561	0.57533	-0.438672	-0.0775135	0.278741	0.571393	0.345438	0.534744	0.332757	-0.504842	-0.449946	-0.436476	-0.436823	-0.454923	0.482616	-0.207391	-0.198478	-0.399423	-0.113277	0.139485
HUANG_GATA2_TARGETS_DN	1.18701e-06	0.00538192	-0.306741	-0.310507	-0.0765475	-0.363752	-0.336683	-0.134454	-0.157579	-0.258493	-0.259858	-0.240848	-0.073725	-0.155698	-0.203022	-0.207972	-0.350004	-0.218677	-0.00126318	0.0307949	-0.0297617	-0.213649	0.192369	0.011628	0.112347	-0.123305	-0.0389194	-0.182127	-0.140924	0.0450769	0.109719	0.0532664	-0.135553	0.169196	0.0682206	-0.0398127	0.125944	0.00694364	-0.313987	-0.255178	0.0134426	-0.289004	-0.137034	-0.0581751	-0.0735377	-0.0586744	0.0628788	0.0446921	-0.0256645
LUCAS_HNF4A_TARGETS_UP	1.2294e-06	0.00557288	0.00417841	0.195511	0.323744	0.0875691	0.33313	-0.161485	0.220829	0.025539	-0.131803	0.208376	-0.167	-0.108185	0.063755	0.0645418	-0.0630443	-0.145788	-0.00595649	0.0720731	0.309142	-0.119619	-0.152345	-0.0162583	0.291616	-0.227298	0.0848023	0.120859	0.133369	0.00964921	-0.0467806	0.0873344	-0.043178	0.131657	0.121278	-0.207546	0.0303299	-0.113309	0.0588674	-0.0861103	0.0938364	0.19626	0.0700818	-0.122958	-0.0533186	0.0933929	0.249687	0.197076	0.357376
LI_WILMS_TUMOR_VS_FETAL_KIDNEY_1_DN	1.22954e-06	0.00557288	-0.0469842	-0.0957233	-0.219177	-0.38024	-0.161401	0.265197	-0.334013	-0.0851815	-0.339229	-0.479758	0.228722	-0.136821	-0.412364	-0.377603	-0.016858	-0.0288825	0.0708441	0.137805	0.0245885	-0.254667	0.402008	0.431551	0.138888	0.191336	0.0190095	-0.39371	0.276128	0.156037	0.467464	-0.386021	-0.199695	0.0529069	0.415603	0.150381	0.359842	0.303651	-0.421461	-0.27502	-0.45095	-0.402702	-0.361669	0.407197	-0.338576	-0.252012	-0.393335	-0.227484	-0.198767
GRAHAM_CML_QUIESCENT_VS_CML_DIVIDING_DN	1.25428e-06	0.00568315	-0.561158	-0.610229	0.0828659	-0.270986	-0.300687	-0.164685	-0.199707	0.0840129	0.121278	-0.499926	-0.0697349	-0.151773	0.0693133	0.0998619	0.13324	0.142133	0.487836	0.193136	-0.204463	-0.446566	0.591743	0.0858798	0.169328	0.559118	0.0371143	-0.340891	0.120203	0.10893	0.433182	-0.146362	-0.321501	0.538638	0.41912	0.293422	0.312695	0.238604	-0.254127	-0.44669	-0.282657	-0.164164	-0.199504	0.321066	0.0134718	-0.26915	0.0137247	-0.47717	-0.287114
REACTOME_TELOMERE_MAINTENANCE	1.25633e-06	0.00569117	-0.331379	-0.214493	-0.00493381	-0.106515	-0.280205	-0.0293943	-0.5133	-0.445558	-0.516543	-0.481419	0.181953	-0.214075	-0.0856594	-0.212635	-0.0535812	0.214062	0.11127	-0.110528	-0.0366223	-0.479755	0.54759	0.483691	0.489509	0.397714	0.146641	-0.518411	0.25414	0.465492	0.450123	-0.534953	-0.36189	0.346357	0.502289	0.266897	0.470021	0.301753	-0.453933	-0.448625	-0.558896	-0.370226	0.0487347	0.367657	-0.340115	-0.146078	-0.476814	-0.0565158	0.215898
PID_FOXM1_PATHWAY	1.3403e-06	0.00607022	-0.130432	-0.347938	-0.322865	-0.297703	-0.40222	0.0567975	-0.110191	-0.427197	-0.297527	-0.386288	0.2152	-0.282113	-0.309411	-0.352719	0.0333248	0.0712263	0.0463388	0.0268639	-0.118838	-0.247653	0.420461	0.185595	0.328487	0.294093	-0.187408	-0.495874	0.153161	0.191574	0.36349	-0.220694	-0.10045	0.206536	0.380341	0.343119	0.368015	0.191392	-0.273607	-0.311281	-0.206839	-0.451444	-0.454751	0.135023	0.104905	0.015544	-0.194687	0.00519341	-0.212357
KANG_DOXORUBICIN_RESISTANCE_UP	1.39458e-06	0.00631467	-0.238183	-0.493386	-0.527569	-0.544664	-0.466897	0.406805	-0.586864	-0.483809	-0.318595	-0.617931	0.50327	-0.0769539	-0.504468	-0.460921	-0.146068	0.143925	0.484459	0.150711	-0.297197	-0.575232	0.590277	0.434152	0.174479	0.498162	0.119126	-0.589412	0.259466	0.422072	0.639455	-0.528801	0.0357304	0.353037	0.590694	0.500808	0.586974	0.372539	-0.590619	-0.523605	-0.488726	-0.577902	-0.619598	0.603306	0.00979582	-0.0177283	-0.508936	-0.0827324	-0.0406567
LIANG_SILENCED_BY_METHYLATION_DN	1.39819e-06	0.00632962	-0.518731	-0.49573	-0.582156	-0.556594	-0.230058	0.243731	-0.611807	-0.588468	-0.572952	-0.595988	0.321529	-0.0212668	-0.325734	-0.308019	-0.0258903	0.345091	0.443031	-0.365364	-0.198823	-0.610246	0.617027	0.429311	-0.0281726	0.61483	-0.0356358	-0.655451	0.366174	0.614167	0.79317	-0.643873	-0.00172434	0.497959	0.665923	0.262654	0.632814	0.124664	-0.572661	-0.680515	-0.634246	-0.638059	-0.612646	0.601877	-0.371695	-0.126107	-0.495688	-0.301256	-0.0419962
KEGG_PROPANOATE_METABOLISM	1.46837e-06	0.00664583	0.394092	0.394807	0.185022	-0.0866669	0.124048	0.210176	0.232897	-0.0949096	-0.322611	-0.0913561	-0.211845	-0.236746	-0.177727	0.198501	0.128522	-0.30922	-0.194479	-0.300412	0.418717	-0.0431655	-0.228569	-0.0849222	0.100467	0.136174	0.233936	0.0464903	-0.00136221	-0.339064	0.170385	-0.40347	-0.370613	0.0268745	0.192254	-0.301384	0.127534	-0.241219	0.138214	0.367625	-0.470248	0.482833	0.108554	0.294977	-0.249805	-0.190556	-0.25838	0.0401598	0.346622
JAEGER_METASTASIS_UP	1.55132e-06	0.00701973	-0.0550152	-0.495422	-0.127085	-0.149518	-0.329299	-0.121967	-0.412717	-0.235126	-0.225352	-0.497752	0.30744	0.26599	-0.352004	-0.209849	0.137527	-0.193341	0.232702	-0.282689	-0.15593	-0.220697	0.202423	0.140098	0.0351924	0.061095	0.100868	-0.358423	0.133638	0.280414	0.457979	-0.258709	-0.119064	0.0880497	0.392599	0.0129429	0.42973	-0.235551	-0.185437	-0.216342	-0.174726	-0.56537	-0.527447	0.38808	0.28424	-0.222677	-0.330889	0.124688	-0.240106
FISCHER_G2_M_CELL_CYCLE	1.65274e-06	0.00747698	-0.210104	-0.33658	-0.309542	-0.317537	-0.195926	0.170416	-0.289623	-0.228038	-0.307707	-0.370917	0.276911	-0.103666	-0.342207	-0.279123	-0.0791706	-0.106753	0.327678	0.155463	-0.256858	-0.366744	0.334802	0.367195	0.0839521	0.310874	-0.0304429	-0.263988	0.0930549	0.191274	0.398909	-0.290753	-0.163213	-0.0472529	0.27925	0.277722	0.299661	0.303842	-0.398391	-0.19191	-0.311729	-0.340365	-0.274222	0.240606	-0.0922093	-0.218263	-0.383406	-0.0391235	-0.0538241
LY_AGING_PREMATURE_DN	1.69798e-06	0.00767995	0.0892235	-0.239125	-0.0644691	-0.302493	-0.316753	0.415863	-0.297727	-0.428796	-0.424512	-0.440302	0.384966	-0.0675934	-0.103227	-0.0697268	0.161467	0.0816475	0.403188	-0.204995	0.0876959	-0.446221	0.386882	0.379593	0.378291	0.592593	0.220761	-0.485279	0.323632	0.37651	0.377832	-0.107857	-0.269382	0.274338	0.435191	0.175462	0.435843	0.132814	-0.495732	-0.444589	-0.356237	-0.308453	-0.225284	0.321193	-0.119545	-0.308433	-0.318771	-0.102123	-0.1481
SMID_BREAST_CANCER_BASAL_UP	1.69993e-06	0.00768707	0.0162073	-0.265845	0.00761906	-0.227732	-0.228613	-0.122372	-0.347761	-0.180971	-0.159178	-0.267072	0.264625	0.0778941	-0.0775404	-0.0133577	-0.0454076	-0.118264	0.044821	0.171132	0.0260687	-0.255918	0.290704	0.0430433	0.105353	0.2405	0.143736	-0.185708	0.000324132	0.162003	0.264105	0.14519	-0.114272	0.0746177	0.212666	0.0605948	0.226696	0.112663	-0.237477	-0.21774	0.0998063	-0.341649	-0.244594	0.0778167	-0.0637894	-0.248309	-0.148272	-0.055763	-0.134319
SMIRNOV_RESPONSE_TO_IR_6HR_DN	1.80939e-06	0.00818023	-0.222624	-0.343209	-0.212897	-0.235116	-0.252356	-0.156133	-0.385282	-0.218481	-0.253898	-0.241536	0.282243	-0.309689	0.273061	0.171565	-0.268668	-0.00112657	0.278049	0.141797	-0.202589	-0.247842	0.118772	0.108535	0.0187119	0.205902	0.00915198	-0.236981	0.230818	0.330151	0.186952	0.0504377	-0.294073	0.295722	0.282577	-0.158476	0.288904	-0.073285	-0.410879	-0.206032	-0.0664372	-0.408004	-0.245482	-0.124278	-0.0287006	-0.0891217	0.298467	0.00971897	-0.357498
WANG_RESPONSE_TO_GSK3_INHIBITOR_SB216763_DN	1.81129e-06	0.00818703	-0.1052	-0.104037	-0.206506	-0.292246	-0.314051	0.0551997	-0.365358	-0.27305	-0.284947	-0.38985	0.1519	-0.230774	-0.262334	-0.259954	-0.00370609	0.0775566	0.136164	0.00651103	0.162059	-0.265954	0.295619	0.213422	0.339048	0.286115	0.185061	-0.391428	0.265371	0.212284	0.382808	-0.230961	-0.171783	0.179703	0.381559	0.1193	0.380808	0.112295	-0.391317	-0.343318	-0.320625	-0.300806	-0.19085	0.26079	-0.118032	-0.127316	-0.247239	-0.0640475	-0.0448219
WEST_ADRENOCORTICAL_TUMOR_MARKERS_UP	1.81597e-06	0.00820639	0.182359	-0.252872	-0.0835604	-0.380626	-0.379495	0.295456	-0.678657	-0.178894	-0.234494	-0.614357	0.470041	-0.237872	-0.531106	-0.171685	-0.0670792	0.0282866	0.430285	-0.179175	-0.119099	-0.568596	0.480775	0.335098	0.234218	0.603617	0.361924	-0.583971	0.346717	0.392886	0.318789	-0.461365	-0.200463	0.345637	0.487249	0.156873	0.351617	0.253034	-0.60702	-0.423376	-0.488757	-0.312737	-0.487375	0.449032	-0.338616	-0.134205	-0.410888	-0.231276	-0.183455
PID_HNF3A_PATHWAY	1.83429e-06	0.00828731	0.128914	0.181595	0.419784	0.0691623	0.188232	-0.160038	0.120237	0.0593096	-0.303432	-0.00642862	0.0160267	-0.308246	0.0572536	-0.00847003	0.365195	0.276755	-0.0131026	0.035285	0.0693855	-0.214523	0.014951	-0.0627206	0.019027	0.243701	0.114561	0.0955408	-0.194255	-0.00301318	0.00711016	0.22861	-0.335925	0.0348124	-0.208254	-0.119674	-0.248757	-0.0454307	-0.0227628	0.310604	0.0779464	-0.00902812	0.294059	-0.301979	0.0844579	0.0550246	0.144786	0.322928	-0.108745
PID_FRA_PATHWAY	1.8956e-06	0.00856244	0.0430412	-0.57188	0.191418	-0.3156	-0.250838	-0.353791	-0.178094	-0.432542	-0.313647	-0.130615	0.240618	-0.297334	-0.159259	0.29881	-0.121825	-0.0382719	-0.0157585	0.110352	0.24299	-0.265085	0.190721	-0.496574	0.260435	0.127778	0.0659072	-0.427553	-0.0957715	0.456575	-0.00249985	0.324545	-0.374314	0.391958	0.29779	-0.292488	0.357967	-0.140793	-0.336319	-0.342133	0.20575	-0.46406	-0.412864	-0.256513	-0.0366469	-0.242425	0.384136	-0.22152	-0.415821
ROSTY_CERVICAL_CANCER_PROLIFERATION_CLUSTER	1.93052e-06	0.00871825	-0.0910029	-0.369584	-0.388168	-0.535624	-0.432254	0.433553	-0.512298	-0.449884	-0.446534	-0.633292	0.41929	-0.129679	-0.487973	-0.40868	0.0929911	0.16781	0.406404	0.0548332	-0.0870563	-0.58159	0.560649	0.452041	0.392828	0.507901	0.143624	-0.623772	0.436057	0.41504	0.648515	-0.58898	0.0106015	0.380113	0.608398	0.422547	0.611825	0.394752	-0.577268	-0.508751	-0.533681	-0.461399	-0.471534	0.572632	-0.264705	-0.160822	-0.573216	-0.156901	0.163048
KOBAYASHI_EGFR_SIGNALING_24HR_DN	1.95176e-06	0.00881219	-0.101335	-0.345348	-0.312808	-0.378911	-0.360765	0.310224	-0.473551	-0.360767	-0.329024	-0.516183	0.390684	-0.0680673	-0.414632	-0.435706	0.0955146	0.181852	0.164371	-0.0225759	-0.0592133	-0.475688	0.493814	0.390399	0.338282	0.396794	0.207359	-0.51464	0.261848	0.382281	0.530025	-0.34233	-0.00715379	0.308048	0.51251	0.272381	0.544197	0.248171	-0.53149	-0.492794	-0.367313	-0.46203	-0.421625	0.474903	-0.0534235	-0.266207	-0.492287	-0.126242	0.00260878
SENGUPTA_NASOPHARYNGEAL_CARCINOMA_UP	2.01295e-06	0.00908646	-0.302244	-0.305341	-0.162146	-0.159886	-0.127707	0.135307	-0.274846	-0.127467	-0.221063	-0.3367	0.388081	0.208611	-0.226671	0.122556	0.0276151	0.0408123	0.259408	-0.100282	-0.303775	-0.129988	0.139925	0.190222	-0.191918	0.165556	-0.205379	-0.120025	-0.147956	0.350753	0.178427	-0.133709	-0.189512	0.0416535	0.110406	0.0487414	0.110407	-0.0116016	-0.265321	-0.120465	-0.273086	-0.372147	-0.304555	0.110514	0.0258648	-0.0703646	-0.190413	-0.0482186	-0.165083
PUJANA_BREAST_CANCER_WITH_BRCA1_MUTATED_UP	2.10683e-06	0.00950812	-0.313043	-0.258795	-0.441863	-0.431659	-0.306383	0.461679	-0.397762	-0.344672	-0.247475	-0.44237	0.222301	-0.190444	-0.379061	-0.321052	-0.0588476	-0.0545896	0.283104	0.0149178	-0.432877	-0.279619	0.439951	0.339961	-0.0601791	0.328626	-0.0843068	-0.426762	0.0949087	0.0897148	0.544506	-0.475917	-0.316603	0.0514203	0.346411	0.387899	0.279244	0.364184	-0.450643	-0.26526	-0.463925	-0.413142	-0.394698	0.527557	-0.233384	-0.162649	-0.434715	-0.313926	0.186901
DOANE_BREAST_CANCER_ESR1_UP	2.18449e-06	0.00985643	0.265151	0.400693	0.255189	0.105295	0.211393	-0.228814	0.141591	0.237151	0.142337	0.338294	0.207273	-0.103424	0.32987	0.38437	0.0701624	0.187075	0.224236	0.123396	0.365018	-0.262919	-0.251483	0.293705	0.201487	0.211488	0.110498	0.248054	0.126483	-0.279698	-0.0686672	0.154502	-0.00870453	0.156503	-0.218223	-0.199081	-0.232975	-0.23166	0.174633	0.178646	0.292204	0.214021	0.221375	-0.215356	0.0450233	-0.0779436	0.090594	0.409842	0.233265
CROONQUIST_NRAS_SIGNALING_DN	2.20313e-06	0.00993833	-0.0795853	-0.336732	-0.347077	-0.41244	-0.371668	0.371266	-0.437351	-0.423241	-0.436374	-0.484263	0.361372	-0.0271176	-0.455153	-0.497228	0.0021998	0.120073	0.367524	-0.0665732	-0.135493	-0.516093	0.540712	0.434054	0.342188	0.427709	0.0408845	-0.58029	0.344658	0.322731	0.588979	-0.45816	-0.182668	0.35934	0.587646	0.381535	0.567464	0.359114	-0.511913	-0.415169	-0.43418	-0.383016	-0.453793	0.547105	-0.225634	-0.217253	-0.466729	-0.188594	0.131325
CHANG_CYCLING_GENES	2.25626e-06	0.0101758	-0.166052	-0.347403	-0.275391	-0.43141	-0.332315	0.356235	-0.473842	-0.366722	-0.361596	-0.570787	0.350897	0.0573844	-0.409046	-0.427701	0.0493373	0.094901	0.30525	0.119736	-0.246942	-0.433508	0.447636	0.396309	0.263491	0.493708	0.207792	-0.494888	0.337136	0.307275	0.497439	-0.452673	0.132222	0.247226	0.490466	0.34368	0.484468	0.29831	-0.481502	-0.405791	-0.41199	-0.394772	-0.287896	0.466013	-0.0703653	-0.194508	-0.47755	-0.117869	0.0543758
SOTIRIOU_BREAST_CANCER_GRADE_1_VS_3_UP	2.32838e-06	0.0104987	0.076364	-0.322995	-0.374794	-0.514319	-0.39106	0.463936	-0.565303	-0.451355	-0.48597	-0.623565	0.432717	-0.217579	-0.495789	-0.393461	-0.0374691	0.227374	0.417366	0.0464794	0.160087	-0.566317	0.518575	0.458217	0.419241	0.44814	0.29424	-0.611047	0.48565	0.400851	0.644944	-0.530852	-0.164091	0.415192	0.618787	0.385987	0.620536	0.367461	-0.619409	-0.527243	-0.522724	-0.504291	-0.430068	0.580797	-0.259111	-0.156376	-0.528487	-0.221069	-0.0352345
LY_AGING_OLD_DN	2.46719e-06	0.0111221	0.0504081	-0.289743	-0.213673	-0.360478	-0.315485	0.363494	-0.228605	-0.384322	-0.458405	-0.51262	0.432462	-0.0426806	-0.264778	-0.0372149	0.175896	0.049412	0.305278	-0.0538557	0.0692389	-0.449446	0.367136	0.355106	0.314104	0.488805	0.152879	-0.413081	0.356662	0.401094	0.488514	-0.41642	-0.282894	0.302985	0.514118	0.236522	0.521551	0.167665	-0.511566	-0.414679	-0.35125	-0.298275	-0.216137	0.321046	-0.242086	-0.277852	-0.368648	-0.215722	-0.246498
DODD_NASOPHARYNGEAL_CARCINOMA_DN	2.48302e-06	0.011191	-0.0525451	-0.0749009	-0.0936272	-0.222331	-0.116418	0.268094	-0.207368	-0.0359221	-0.205436	-0.320324	0.257016	0.0531938	-0.339721	-0.105285	0.0918467	-0.0350941	0.00557758	-0.120751	-0.0331314	-0.0725265	0.142215	0.149951	0.010664	0.143875	0.024195	-0.145431	0.0919634	0.160439	0.346878	-0.287118	-0.118193	0.0128011	0.245867	0.150515	0.24222	0.201517	-0.293961	-0.121559	-0.338322	-0.260606	-0.217712	0.237865	-0.182182	-0.139554	-0.324287	-0.184938	-0.0999997
PID_DELTA_NP63_PATHWAY	2.5212e-06	0.0113605	-0.107363	-0.270216	-0.244997	0.208625	-0.0814618	-0.27877	0.107431	-0.0183568	-0.153395	0.218912	0.289876	0.264721	-0.30903	-0.163091	0.274729	-0.0868419	-0.194558	0.283535	-0.297879	0.0829423	0.300652	-0.198775	-0.257104	-0.0438534	-0.0129464	-0.157558	-0.307245	0.286418	-0.116883	-0.0554634	-0.0441839	-0.220843	-0.044677	0.129829	-0.0895331	0.317561	-0.0408036	-0.0488883	0.209574	-0.326148	-0.275249	0.131721	0.179123	-0.286751	-0.12292	-0.100879	-0.28933
ZHENG_RESPONSE_TO_ARSENITE_DN	2.62603e-06	0.0118303	-0.341255	-0.180121	0.0231108	-0.173313	0.0596001	-0.361784	-0.347895	-0.125071	0.146238	0.0442489	-0.0658955	-0.269149	-0.275461	-0.281264	-0.168688	-0.0705664	-0.0446194	0.408773	-0.0131251	-0.465815	0.475615	-0.396527	0.214749	0.054128	0.0677526	0.157899	-0.243504	0.0770506	-0.0202161	0.390788	-0.214396	0.228359	-0.127379	-0.0306324	-0.153698	0.242269	-0.48064	-0.126723	-0.121086	-0.0545166	-0.286152	-0.196084	-0.481368	-0.349715	-0.187177	-0.474282	-0.0671564
REACTOME_BRANCHED_CHAIN_AMINO_ACID_CATABOLISM	2.66745e-06	0.0120142	0.184397	0.391682	0.431041	0.0751201	0.290055	0.24873	0.181175	0.0853361	-0.104981	0.101979	-0.461154	0.378952	-0.311792	0.300806	0.101385	0.274188	-0.1181	-0.29012	0.36283	0.0165377	-0.539266	-0.0589493	0.0159685	0.186253	0.156895	0.375064	-0.0219451	-0.143565	-0.0228881	-0.387557	0.0773188	-0.00436668	0.00547504	-0.163453	-0.0439798	0.339598	0.0679046	0.390081	-0.220258	0.470906	0.351237	-0.119086	-0.464069	-0.146746	-0.471343	0.14482	-0.03522
KAN_RESPONSE_TO_ARSENIC_TRIOXIDE	2.66917e-06	0.0120193	-0.0981457	-0.457696	-0.0344759	-0.348435	-0.357681	-0.200837	-0.384028	-0.363737	-0.262672	-0.367922	0.0364095	-0.223554	0.145678	0.16418	-0.205065	-0.198516	0.183171	0.0355943	0.22778	-0.384457	0.289735	-0.0870508	0.25352	0.237526	0.20054	-0.175606	0.081012	0.227187	0.288675	0.128233	-0.317845	0.205797	0.264057	-0.20608	0.299558	-0.0418184	-0.438588	-0.293249	0.054799	-0.279472	-0.231641	-0.0688495	-0.043161	-0.429039	0.126667	-0.21227	-0.114696
GREENBAUM_E2A_TARGETS_UP	2.7078e-06	0.0121905	-0.00426719	-0.443504	-0.270404	-0.428484	-0.261508	0.306632	-0.465641	-0.342544	-0.549958	-0.625408	0.176834	0.0396277	-0.498053	-0.286826	0.158984	0.221701	0.398136	0.151515	-0.145287	-0.517355	0.505204	0.392631	0.254178	0.476521	0.190117	-0.528762	0.317701	0.329634	0.621198	-0.575879	-0.0662585	0.261947	0.544631	0.236608	0.588305	0.0940189	-0.469653	-0.318872	-0.347501	-0.507268	-0.465543	0.203694	-0.211343	-0.275107	-0.501646	-0.153917	0.0249033
MASSARWEH_TAMOXIFEN_RESISTANCE_UP	2.79706e-06	0.0125895	-0.0229557	-0.0436954	0.172109	0.0974665	0.188716	-0.0828607	0.111603	0.280503	0.175711	0.120499	0.134198	0.141901	0.0018565	0.09758	-0.115807	-0.126533	-0.0186219	0.0627341	-0.0234662	0.0612237	-0.132924	0.018988	-0.12431	0.0301742	-0.00490819	0.313748	-0.131331	-0.15399	-0.146366	0.151321	0.0512777	-0.173294	-0.204883	0.0142478	-0.207145	0.0371908	0.207649	0.134866	0.290247	0.0276978	0.0915932	-0.138392	0.172573	0.00800898	0.0268853	0.149662	0.116963
CROMER_TUMORIGENESIS_UP	2.86833e-06	0.0129075	0.01393	-0.574739	0.204394	-0.415252	-0.473596	-0.348382	-0.440893	-0.445575	-0.246114	-0.45991	0.312039	0.176576	-0.163177	0.216481	-0.338606	-0.172707	0.163057	-0.101115	-0.0189409	-0.230803	0.316309	-0.205926	0.352492	-0.235293	-0.054853	-0.441542	-0.0913227	0.612078	0.11368	0.119122	-0.368901	-0.0764083	0.439789	-0.205202	0.44345	-0.29526	-0.438496	-0.295316	0.179788	-0.635448	-0.421985	0.294733	0.277436	-0.390446	-0.141949	-0.136203	-0.176162
RODRIGUES_THYROID_CARCINOMA_POORLY_DIFFERENTIATED_DN	3.02534e-06	0.013611	-0.0691994	0.02296	0.13012	0.163214	0.303886	-0.081362	0.257494	0.155621	0.175988	0.270515	0.0133818	0.128431	0.0933882	0.131693	-0.029177	-0.159112	-0.0984879	0.105205	-0.107743	0.139234	-0.164658	-0.0905648	-0.250752	0.025732	-0.0780491	0.330326	-0.255032	-0.0743001	-0.253271	0.183595	-0.021253	-0.146733	-0.343009	-0.00869193	-0.332231	0.0450446	0.20606	0.220509	0.239394	0.153688	0.0766699	-0.181969	0.112773	0.028203	0.208112	0.0751682	-0.00975873
RUIZ_TNC_TARGETS_DN	3.18318e-06	0.0143179	-0.245473	-0.381431	-0.186685	-0.276314	-0.212916	0.128587	-0.423295	-0.247154	-0.236016	-0.370331	0.41857	0.0165601	-0.279615	-0.221605	0.123277	0.082762	0.195279	0.146245	0.0552345	-0.44352	0.453662	0.0930948	0.248415	0.364697	0.114338	-0.367243	0.16605	0.334128	0.477685	-0.02331	0.0615442	0.367466	0.451913	0.130592	0.453938	0.123304	-0.38032	-0.39227	-0.145591	-0.392413	-0.366588	0.357212	-0.0472891	-0.223333	-0.306171	-0.0873015	-0.135279
SERVITJA_LIVER_HNF1A_TARGETS_DN	3.22305e-06	0.0144941	-0.0298197	-0.244541	0.0860623	0.285624	0.252926	-0.120592	0.0211682	0.0481883	0.249375	0.220074	-0.0331296	-0.197917	0.198508	0.275293	-0.0797677	0.0322886	0.0809329	-0.0770614	0.0208529	-0.0197427	-0.11434	0.00666603	-0.12835	-0.0147001	0.0960361	0.0841541	-0.219757	0.11287	-0.162539	0.225268	0.0570899	0.147699	-0.226366	-0.191834	-0.187223	-0.260629	0.25608	-0.108839	0.290963	0.145229	-0.0127344	-0.104742	0.100504	-0.122295	0.213215	0.339462	0.0100859
SHEPARD_CRUSH_AND_BURN_MUTANT_DN	3.32459e-06	0.0149474	-0.114372	-0.279114	-0.280232	-0.230515	-0.00223222	0.194244	-0.311225	-0.140806	-0.176936	-0.379097	0.187457	0.184629	-0.17566	-0.274062	0.0969859	0.0306093	0.271652	0.050763	-0.201363	-0.366761	0.253191	0.198999	-0.112748	0.106147	0.059767	-0.151712	0.0200041	0.11703	0.3382	-0.255878	-0.014689	-0.0190617	0.241972	0.215433	0.221671	0.211263	-0.343312	-0.0565629	-0.175418	-0.299435	-0.29761	0.313479	-0.0113285	-0.166668	-0.188502	-0.093801	-0.13947
BENPORATH_CYCLING_GENES	3.3397e-06	0.015012	-0.0375015	-0.104034	-0.133792	-0.204207	-0.0776427	0.114639	-0.198211	-0.185354	-0.165316	-0.300483	0.147362	0.0218636	-0.236121	-0.207269	0.0404376	0.0242073	0.043667	0.00496737	-0.0488173	-0.230593	0.140487	0.133041	0.115853	0.247372	0.0659618	-0.172417	0.0733629	0.218774	0.282794	-0.222856	-0.138048	-0.0158535	0.230019	0.198031	0.236186	0.229787	-0.273	-0.198484	-0.231284	-0.223031	-0.104111	0.202761	-0.0935826	-0.0604798	-0.27695	-0.136654	0.00745116
FINETTI_BREAST_CANCER_KINOME_RED	3.41516e-06	0.0153477	-0.33647	-0.331458	-0.504002	-0.374432	-0.36857	0.532604	-0.558532	-0.294883	-0.468994	-0.752132	0.585916	-0.0668793	-0.627912	-0.362012	-0.0406142	0.339473	0.501289	0.261774	-0.407797	-0.6672	0.5653	0.697195	-0.000180423	0.195754	-0.0333359	-0.599936	0.186405	0.0827503	0.626558	-0.475832	0.143745	-0.0248685	0.552976	0.577101	0.573837	0.585642	-0.617896	-0.40545	-0.448942	-0.640554	-0.545961	0.672304	0.108534	-0.0394128	-0.726157	-0.265649	0.124136
GRAHAM_CML_DIVIDING_VS_NORMAL_QUIESCENT_UP	3.43164e-06	0.0154183	-0.144182	-0.259215	-0.199854	-0.362837	-0.188636	0.311194	-0.434065	-0.372719	-0.393723	-0.467411	0.355197	-0.0975877	-0.373217	-0.182197	0.209744	0.114058	0.233628	0.00354483	0.129389	-0.462837	0.45479	0.280956	0.368253	0.467424	0.166763	-0.46649	0.254667	0.313839	0.547654	-0.422989	-0.161724	0.367284	0.496065	0.198149	0.489858	0.266629	-0.474481	-0.446776	-0.346441	-0.362111	-0.260286	0.439812	-0.192442	-0.18563	-0.368649	-0.108863	0.0533779
LI_WILMS_TUMOR_VS_FETAL_KIDNEY_1_UP	3.43394e-06	0.0154253	0.00179839	-0.146998	0.362229	0.046406	0.255257	-0.166333	0.0241946	-0.0372453	-0.193	-0.0761362	0.164106	0.109556	0.0341962	0.243464	-0.0572865	-0.115176	-0.0761888	-0.0528852	0.101081	-0.235294	-0.155395	-0.327006	0.0813602	0.199512	0.186708	0.25039	-0.179974	0.0646215	-0.184516	0.218391	-0.151025	0.181091	-0.101578	-0.288594	-0.143418	-0.130375	-0.00432471	-0.00989509	0.168424	0.129952	0.042554	-0.194219	0.0409405	-0.231297	0.120239	0.129845	0.101689
LE_EGR2_TARGETS_UP	3.64292e-06	0.0163604	-0.145595	-0.369581	-0.202123	-0.399896	-0.314433	0.193374	-0.402938	-0.320402	-0.32613	-0.466798	0.282895	-0.0916758	-0.318063	-0.189659	0.0512842	-0.105421	0.271074	0.0867398	0.0376579	-0.417536	0.420633	0.281952	0.281485	0.447104	0.18313	-0.396388	0.20699	0.372079	0.455535	-0.282553	-0.0656584	0.32503	0.469718	0.137056	0.466798	0.187155	-0.471085	-0.347696	-0.318322	-0.450809	-0.368739	0.219755	-0.0798565	-0.247981	-0.2628	-0.0918973	0.0258987
WHITFIELD_CELL_CYCLE_S	3.73973e-06	0.0167914	-0.219955	-0.266446	-0.200792	-0.138897	-0.148018	0.227152	-0.156103	-0.0801057	0.00976264	-0.246498	0.317731	0.116714	-0.0790083	-0.170448	0.195974	0.238898	0.0751344	0.0339164	-0.28393	-0.239273	0.00343231	0.119287	-0.0736489	0.21551	-0.071211	-0.0762284	-0.105967	0.142215	0.134462	-0.264831	-0.0783799	-0.144698	-0.0485431	0.279694	-8.95738e-05	0.310705	-0.170795	-0.204574	-0.180078	-0.113234	0.0411305	0.27689	0.0673685	0.0130955	-0.319839	-0.145301	0.0366583
MARKEY_RB1_CHRONIC_LOF_UP	3.83248e-06	0.017204	-0.17779	-0.222678	-0.0282337	-0.334999	-0.295487	-0.136612	-0.335917	-0.323763	-0.308769	-0.343327	0.112972	0.171441	-0.320487	-0.0852324	-0.00662357	-0.0703524	0.0530231	-0.223617	-0.0603154	-0.278793	0.254175	-0.0604617	0.213701	0.255717	-0.0338652	-0.257603	0.0696456	0.184203	0.231609	-0.145871	-0.0936587	0.220501	0.266447	-0.142578	0.180431	0.000792576	-0.138689	-0.253967	-0.291259	-0.299452	-0.220758	0.293119	-0.0456912	-0.165204	-0.302332	-0.0198147	-0.0529602
HOEGERKORP_CD44_TARGETS_DIRECT_DN	3.85449e-06	0.017299	0.15296	0.318235	0.310929	0.336344	0.561426	0.512582	0.362669	0.0485184	-0.283231	-0.171585	-0.334329	0.182836	-0.124625	0.255675	0.316602	0.132466	-0.278204	0.220057	-0.00775265	-0.0647076	-0.250087	-0.242728	-0.0953628	-0.0562423	-0.0343693	0.341509	-0.119868	0.171992	-0.289738	-0.339732	0.1159	0.131791	-0.340037	-0.18917	-0.374005	0.433537	0.190787	0.125386	0.506548	0.616944	0.198046	-0.178085	0.508536	-0.0412559	0.177317	0.201874	0.167215
KRIGE_AMINO_ACID_DEPRIVATION	3.89379e-06	0.0174714	-0.139304	-0.229517	-0.0599427	-0.409763	-0.421915	-0.282169	-0.344198	-0.0368385	-0.381407	-0.302129	0.311862	-0.322893	-0.0150481	-0.0736977	-0.257789	0.275842	0.105766	-0.0440826	0.107666	-0.0112034	0.180513	0.00532693	0.209405	0.0208434	0.166244	-0.321606	0.0314112	0.420811	0.474927	0.187764	-0.366265	0.059206	0.464595	-0.447022	0.343195	0.133193	-0.550839	-0.238487	0.282573	-0.440004	-0.37232	0.210121	-0.16603	-0.512316	0.00107325	-0.140175	0.0433629
WHITFIELD_CELL_CYCLE_LITERATURE	4.08027e-06	0.0183041	-0.184516	-0.264666	-0.470473	-0.429269	-0.396284	0.398656	-0.484872	-0.486332	-0.464062	-0.619226	0.34573	-0.0680072	-0.492439	-0.438081	-0.0236652	0.226626	0.391142	-0.151426	-0.158712	-0.602228	0.524024	0.362704	0.464328	0.629912	0.214128	-0.619409	0.391417	0.35757	0.684911	-0.544719	-0.15387	0.335667	0.647235	0.320612	0.612984	0.183548	-0.655327	-0.525271	-0.530902	-0.534959	-0.446117	0.438468	0.00913693	-0.310942	-0.480553	-0.0275727	0.0530241
DUTERTRE_ESTRADIOL_RESPONSE_6HR_UP	4.19669e-06	0.0188222	-0.200036	-0.134624	-0.138958	-0.162677	-0.201829	-0.0348707	-0.292843	-0.0808081	-0.204005	-0.098752	0.26753	-0.0778934	-0.311855	-0.240658	0.123317	-0.0325797	-0.120346	0.188207	0.040084	-0.168429	0.210335	0.152482	0.00856144	0.165791	-0.0680263	-0.281646	-0.0513313	0.0124591	0.211034	-0.031317	-0.0472885	0.0742292	0.290619	0.15121	0.281002	0.16323	-0.283668	-0.214281	-0.142035	-0.296771	-0.260719	0.172316	0.00730815	-0.0969052	-0.183859	0.015631	-0.149208
BASAKI_YBX1_TARGETS_UP	4.19705e-06	0.0188222	0.0578698	-0.267328	-0.140652	-0.407956	-0.257001	0.176007	-0.384089	-0.3291	-0.325493	-0.429926	0.224496	-0.0442646	-0.346197	-0.345203	-0.0204491	0.0215456	0.0265596	0.0194784	0.15865	-0.40221	0.374603	0.114548	0.346419	0.348763	0.237204	-0.418715	0.314527	0.332221	0.407149	-0.168139	-0.0321165	0.326588	0.499238	0.101997	0.490505	0.182864	-0.404178	-0.412104	-0.209331	-0.333163	-0.252452	0.394302	-0.0390723	-0.231604	-0.371558	-0.191122	0.0408357
REACTOME_RECEPTOR_LIGAND_BINDING_INITIATES_THE_SECOND_PROTEOLYTIC_CLEAVAGE_OF_NOTCH_RECEPTOR	4.28957e-06	0.0192302	-0.215837	-0.55484	-0.16425	-0.132895	-0.290041	0.0779842	-0.0913567	-0.190116	-0.106735	0.00266349	-0.11185	-0.0463562	0.40776	-0.314018	-0.598822	-0.461986	-0.13911	0.169526	-0.24771	-0.192444	0.420808	0.108608	0.125325	-0.198933	0.0422162	0.0859127	-0.531208	-0.124712	-0.626061	0.149063	-0.0264192	-0.239144	-0.175437	0.378895	-0.115346	0.0559158	-0.0543308	0.19914	0.330481	-0.323245	-0.523827	0.180743	-0.314008	-0.345704	-0.261691	-0.643831	-0.352966
NIELSEN_GIST	4.34974e-06	0.0194955	0.0646149	-0.0588841	0.207796	0.133669	0.170761	-0.135953	0.0757631	0.0431105	-0.0842671	0.115427	0.0699966	0.0717532	0.222556	0.288044	0.0158048	-0.00298927	0.0138195	-0.274683	0.141259	0.0744895	-0.194562	-0.0728361	0.0933091	0.1425	-0.106212	0.251718	-0.138211	0.0403309	-0.258116	0.209681	0.0533924	0.182632	-0.0725015	-0.326377	-0.0912881	-0.287805	0.124574	0.0221135	0.0565697	0.11117	0.123252	-0.37323	0.172132	-0.0470293	0.134727	0.0264322	-0.0125015
OXFORD_RALA_OR_RALB_TARGETS_UP	4.47676e-06	0.0200604	0.134345	-0.165543	-0.278114	-0.454261	-0.431826	0.404159	-0.509561	-0.463714	-0.368257	-0.626755	0.00410087	-0.31042	-0.595843	-0.463034	0.331688	0.0540762	0.00996744	-0.0527144	0.230991	-0.555032	0.484882	0.429072	0.411661	0.384031	0.312664	-0.598408	0.507223	0.406045	0.635795	-0.442097	0.137143	0.448765	0.598642	0.314675	0.604095	0.388548	-0.556064	-0.507031	-0.416514	-0.358205	-0.41769	0.510755	-0.0506362	-0.262756	-0.522648	-0.040479	-0.0465344
DODD_NASOPHARYNGEAL_CARCINOMA_UP	4.50018e-06	0.0201608	0.111242	0.25641	0.14709	0.206273	0.160518	-0.248715	0.148693	0.170672	0.199531	0.327663	0.0565132	-0.0573938	0.337875	0.0130691	0.0997203	0.0492562	-0.0285826	0.206595	0.132596	-0.145011	-0.0373392	-0.0609779	0.148933	0.108676	0.108697	0.125077	-0.0638304	-0.207947	-0.181419	0.266257	0.298709	-0.0812884	-0.204813	0.0146741	-0.181315	-0.0467789	0.245079	-0.00870156	0.350131	0.208639	0.173363	-0.148165	0.1278	-0.0238097	0.111179	0.218306	0.128561
REACTOME_FACTORS_INVOLVED_IN_MEGAKARYOCYTE_DEVELOPMENT_AND_PLATELET_PRODUCTION	4.59469e-06	0.0205796	-0.124741	-0.158824	-0.168014	-0.140406	0.0253879	0.0391718	-0.223918	0.0390732	-0.141961	-0.236858	0.0384361	0.107799	-0.0677522	-0.155729	-0.0946434	-0.0961297	0.0815609	-0.0752214	-0.14548	-0.189899	0.115253	0.179417	0.225223	0.0814806	0.0291152	-0.143349	0.0831388	0.179553	0.12661	-0.209433	-0.245397	-0.00692072	0.140533	0.288158	0.162675	0.193199	-0.214064	-0.123007	-0.186869	-0.113032	0.0105337	-0.0998995	-0.000412466	-0.12624	-0.149441	-0.00804892	0.0275667
LINDGREN_BLADDER_CANCER_CLUSTER_1_DN	4.65538e-06	0.0208468	-0.0439821	-0.284621	-0.13068	-0.333897	-0.313793	0.0202911	-0.306883	-0.277046	-0.209878	-0.304171	0.125166	-0.145738	-0.116427	-0.144323	-0.254904	-0.104512	0.219075	-0.157795	-0.00161594	-0.129483	0.0852546	0.0299329	0.246367	0.162601	0.0590208	-0.262986	0.0835887	0.273245	0.158578	0.0349622	0.00683831	0.247452	0.224374	-0.0371533	0.215436	-0.204575	-0.27178	-0.198862	-0.0347925	-0.264681	-0.164397	0.128724	0.0300276	-0.063733	-0.0559579	-0.0334733	0.0489212
LIU_CMYB_TARGETS_DN	4.89372e-06	0.0219092	0.705519	0.329725	0.372209	0.386135	0.169887	0.572484	0.617662	0.272755	-0.0693215	0.0965628	-0.45287	0.0215356	0.306137	0.243067	0.201625	0.185274	-0.0491117	-0.149122	0.337143	-0.117047	-0.0707766	-0.510607	-0.0316835	0.093466	0.368163	0.414013	0.350801	-0.0590267	0.251673	-0.128783	-0.2385	0.511098	-0.0431683	0.219506	0.203889	-0.379142	0.0581593	0.573693	-0.00520708	0.711088	0.500988	-0.253445	-0.0879552	-0.448138	-0.318609	-0.095092	0.551816
KEGG_SYSTEMIC_LUPUS_ERYTHEMATOSUS	4.9078e-06	0.0219673	-0.368381	-0.330095	0.242964	0.108771	-0.0418667	-0.185278	-0.525361	-0.418505	-0.490563	-0.536164	0.329042	-0.345281	0.229502	0.341589	-0.0981865	0.409445	0.263051	-0.106759	0.120505	-0.586817	0.5004	0.218262	0.507582	0.366296	0.26442	-0.408895	0.242265	0.587272	0.456366	-0.441575	-0.477538	0.457228	0.518929	0.283985	0.485751	0.1203	-0.489604	-0.474608	-0.428979	-0.237282	0.327906	0.214131	-0.415173	-0.0573179	-0.175502	-0.00150911	0.164822
FARMER_BREAST_CANCER_CLUSTER_2	4.99246e-06	0.0223413	-0.00294722	-0.575916	-0.498984	-0.283712	-0.266981	0.570457	-0.594931	-0.257476	-0.290117	-0.661331	0.44152	-0.0716254	-0.604696	-0.522734	-0.17866	0.249647	0.348188	0.275958	-0.0386736	-0.562449	0.443219	0.504153	0.153224	0.503112	0.0354442	-0.421414	0.222055	0.32057	0.671395	-0.632778	0.245348	0.0731875	0.587503	0.404698	0.594942	0.492885	-0.681762	-0.532609	-0.615049	-0.375899	-0.532174	0.513619	-0.32269	-0.184953	-0.673065	-0.399303	-0.139868
NIKOLSKY_BREAST_CANCER_16Q24_AMPLICON	4.99412e-06	0.0223437	0.198763	-0.45592	-0.510045	0.110434	-0.416891	-0.54047	0.241815	-0.0375884	-0.0627868	-0.120352	-0.240025	0.0808794	-0.0513909	-0.153394	-0.220372	-0.453231	-0.197946	0.185846	-0.461802	0.0729612	0.497488	0.344997	0.136245	-0.19549	0.125879	-0.40012	0.412724	-0.240073	-0.300651	-0.142901	0.0590961	0.214263	0.116232	0.0132008	0.12945	-0.415558	-0.04621	0.135005	0.507116	-0.314448	-0.436869	0.0948186	0.371339	0.0744415	0.0732125	-0.14727	-0.331694
NADERI_BREAST_CANCER_PROGNOSIS_UP	5.18985e-06	0.0232142	-0.0242128	-0.319492	-0.403613	-0.254607	-0.288357	0.228297	-0.374313	-0.269641	-0.293899	-0.482287	0.186007	-0.188238	-0.486055	-0.44759	-0.198522	0.141808	0.367725	0.390872	-0.0899451	-0.527638	0.429711	0.551338	0.202811	0.237168	0.0206128	-0.499784	0.190129	0.110246	0.448816	-0.466345	0.0635183	0.234947	0.496602	0.421873	0.519103	0.307502	-0.508705	-0.360366	-0.247249	-0.371684	-0.243573	0.389318	0.0886516	-0.245079	-0.424675	-0.0511592	0.107206
SMID_BREAST_CANCER_LUMINAL_B_UP	5.20992e-06	0.0232988	0.239681	0.329815	0.257245	0.191553	0.0361717	-0.147937	0.190306	0.344767	0.210477	0.33033	0.164111	-0.106848	0.167273	0.227183	-0.0103304	0.102677	0.126515	-0.0120486	0.262752	-0.134421	-0.0542005	0.16404	0.0336783	0.0561877	-0.0244543	0.109945	-0.0250121	-0.257671	-0.0735679	0.0140284	0.00132618	0.0477008	-0.230294	0.10195	-0.169847	-0.00593793	0.253792	0.125893	0.16194	0.192236	0.200174	0.00186582	-0.0991587	-0.0525184	-0.0675332	0.169458	0.129263
REACTOME_ORGANIC_CATION_ANION_ZWITTERION_TRANSPORT	5.32726e-06	0.0238182	-0.46623	-0.187089	0.535884	0.737114	-0.0464026	-0.271594	0.338406	0.6132	0.304869	0.525466	-0.411616	-0.270278	0.395179	-0.258107	-0.297172	0.0515176	0.156118	0.416981	0.0483339	0.259079	0.0676132	-0.218348	-0.628783	0.0126131	-0.659567	0.460911	-0.701688	-0.796142	-0.622759	-0.21641	0.552111	-0.502656	-0.047576	-0.158048	-0.143371	-0.523491	0.624866	0.216425	0.595548	0.249711	-0.0177283	0.261795	0.760092	0.51117	0.31537	0.622957	0.572227
KAPOSI_LIVER_CANCER_MET_DN	5.61742e-06	0.0251099	-0.0483233	0.123488	0.197386	-0.474786	0.071531	0.317365	-0.148139	-0.31237	-0.146673	0.284421	-0.473348	-0.481906	0.355813	0.697005	0.402729	0.0583105	0.221463	0.154256	0.501388	-0.303668	-0.282794	0.135812	0.111827	0.0424438	-0.12173	0.212455	-0.331307	-0.267197	-0.350113	-0.192378	0.168711	0.287755	-0.569005	0.0544938	-0.343342	0.270974	0.564766	-0.104402	-0.437353	0.315269	0.184249	0.0226058	-0.4372	-0.173551	-0.0584284	-0.0959364	0.0159086
REACTOME_CELL_CYCLE	5.6453e-06	0.0252288	-0.0202578	-0.129669	-0.238344	-0.213722	-0.171684	0.228861	-0.238866	-0.15998	-0.323116	-0.375852	0.210457	-0.0218889	-0.292164	-0.245709	0.0349148	-0.0140723	0.147913	-0.0450425	-0.0229122	-0.299199	0.270413	0.314083	0.221327	0.285542	0.0651158	-0.256759	0.158703	0.332281	0.391035	-0.42132	-0.248958	0.0565611	0.323106	0.259288	0.336344	0.292087	-0.391069	-0.240071	-0.37017	-0.29183	-0.0316007	0.307462	-0.137931	-0.0127226	-0.360925	-0.131014	0.0597961
REACTOME_ETHANOL_OXIDATION	5.67262e-06	0.0253453	-0.328312	0.612386	0.436904	-0.231256	0.372768	0.167433	-0.194858	-0.320479	-0.0910972	0.253328	-0.0114494	-0.788104	0.601842	0.651317	-0.118692	-0.446189	0.457828	-0.292096	0.188933	-0.192035	-0.436327	-0.580851	0.0792786	0.276939	-0.23238	0.392527	-0.200289	-0.62127	-0.239414	0.107571	-0.111838	0.67246	-0.435554	-0.149787	-0.393698	0.0379204	0.498835	0.577712	0.419236	0.664696	0.520559	-0.383819	-0.146074	-0.0627015	0.560517	-0.121642	0.586385
BOYAULT_LIVER_CANCER_SUBCLASS_G23_UP	6.09395e-06	0.0272217	-0.0117136	-0.265003	-0.301248	-0.456089	-0.394324	0.362461	-0.375275	-0.243441	-0.236819	-0.381067	0.274609	-0.205329	-0.265979	-0.170892	0.0887964	-0.00687324	0.366123	0.166894	0.180616	-0.459962	0.408841	0.435242	0.323536	0.431656	0.134087	-0.386148	0.470843	0.289748	0.537353	-0.345997	-0.200988	0.258453	0.434705	0.350025	0.419892	0.385505	-0.564443	-0.30285	-0.340703	-0.153481	-0.122712	0.379588	-0.284883	-0.198591	-0.260041	-0.298995	0.0151192
FARDIN_HYPOXIA_9	6.25876e-06	0.0279516	0.201702	0.152211	-0.69942	0.0429843	-0.614292	0.085706	-0.707791	0.168506	-0.660394	-0.519768	-0.369585	-0.166407	-0.527091	-0.659444	0.282103	-0.65255	-0.0385324	0.265207	0.105298	-0.0351434	0.0537397	0.488025	0.122889	-0.483829	0.460185	-0.546991	0.644751	0.156303	0.732615	-0.498388	-0.598548	0.355738	0.592724	0.355208	0.472507	-0.00580275	-0.526933	-0.488657	-0.303107	-0.628517	-0.350355	0.220525	-0.523407	-0.439245	-0.398413	-0.337232	-0.557411
DUTERTRE_ESTRADIOL_RESPONSE_24HR_UP	6.50735e-06	0.0290553	-0.186812	-0.338149	-0.316256	-0.323636	-0.336779	0.249328	-0.440049	-0.355897	-0.297955	-0.443384	0.298764	-0.0464269	-0.345336	-0.379681	0.0211078	0.130046	0.325098	0.0521817	-0.234927	-0.394436	0.384347	0.414241	0.144784	0.287749	-0.115336	-0.483129	0.189758	0.151488	0.39598	-0.462598	0.0630534	0.171984	0.385707	0.344243	0.402562	0.295493	-0.37237	-0.391558	-0.373166	-0.433771	-0.403245	0.456385	0.0566282	-0.153043	-0.419121	0.027917	0.126418
MOLENAAR_TARGETS_OF_CCND1_AND_CDK4_DN	6.60508e-06	0.0294851	-0.229341	-0.381746	-0.30005	-0.246157	-0.18511	0.381083	-0.350227	-0.312092	-0.226557	-0.525918	0.372828	0.179612	-0.295621	-0.386534	0.139809	0.121592	0.28735	-0.0419677	-0.2292	-0.395809	0.433727	0.382555	0.271447	0.487801	0.181327	-0.362177	0.290172	0.422327	0.520067	-0.341192	0.0646828	0.291356	0.49029	0.0935347	0.459443	0.19516	-0.486608	-0.437071	-0.381039	-0.352642	-0.389767	0.376611	0.213226	-0.00126587	-0.470177	0.0197323	-0.00153001
KORKOLA_YOLK_SAC_TUMOR_UP	6.64698e-06	0.0296655	0.406594	0.258215	-0.330095	-0.358863	-0.597852	-0.120546	-0.393312	-0.591221	0.149233	-0.208307	-0.009965	-0.527371	-0.0607896	-0.162739	-0.522697	-0.319179	-0.119749	0.209887	0.392754	-0.391488	0.301665	-0.101835	0.267545	-0.488527	-0.429689	-0.295263	0.159194	0.0096256	0.311267	-0.0209343	-0.435692	0.0976456	0.467583	-0.29395	0.385948	0.238606	-0.335647	-0.0745085	0.0471584	-0.635773	-0.510431	0.216265	0.257377	-0.258662	-0.113401	0.261115	-0.40767
PID_PLK1_PATHWAY	6.68195e-06	0.0298149	-0.0484707	-0.24241	-0.350953	-0.256669	-0.166121	0.311294	-0.292623	0.0538976	-0.222515	-0.44393	0.320799	0.134138	-0.43563	-0.382348	-0.0423967	-0.212063	0.482802	0.056826	-0.0793121	-0.37658	0.404797	0.469316	0.145188	0.37355	0.107516	-0.148553	0.197654	0.283344	0.430007	-0.358299	0.059564	-0.14616	0.332528	0.370167	0.385824	0.241051	-0.543871	-0.0815212	-0.328298	-0.317446	-0.124327	0.265818	0.178322	-0.0617582	-0.319617	0.114535	-0.255593
REACTOME_MITOTIC_PROMETAPHASE	6.73202e-06	0.0300315	-0.0134158	-0.278689	-0.325689	-0.180498	-0.26052	0.190356	-0.130431	-0.108365	-0.199333	-0.421815	0.276524	0.117448	-0.248228	-0.153402	0.0620124	-0.124047	0.287342	-0.149169	-0.139537	-0.246818	0.349167	0.277777	0.141212	0.243202	0.0345373	-0.104782	0.101013	0.218297	0.315556	-0.420797	-0.0901332	0.0173711	0.364222	0.388893	0.371309	0.347179	-0.397451	-0.165412	-0.294468	-0.322216	-0.203144	0.309433	0.0498944	0.0408782	-0.35563	-0.325403	-0.173069
PID_E2F_PATHWAY	7.15556e-06	0.0319138	0.0699222	-0.250286	-0.259276	-0.259126	-0.339931	0.126559	-0.40212	-0.309279	-0.245343	-0.364809	0.00913944	-0.316203	-0.303218	-0.334811	0.108198	0.0362699	0.127688	-0.0680428	-0.0937198	-0.303777	0.223531	-0.0363417	0.17439	0.331614	0.0974862	-0.428794	0.070334	0.19924	0.390984	-0.160298	-0.272139	-0.0749406	0.317651	0.107117	0.297349	0.303872	-0.264049	-0.221652	-0.275651	-0.327216	-0.242115	-0.00519838	0.0488403	-0.0230403	-0.255053	-0.0193574	-0.0595235
YANG_BREAST_CANCER_ESR1_UP	7.23286e-06	0.0322513	0.0228868	0.119455	-0.00441058	0.296426	-0.0356033	-0.264274	-0.0578174	0.170399	-0.051868	0.25644	-0.199455	-0.177226	0.228084	0.121965	-0.161401	-0.254491	0.114235	0.104194	0.297822	-0.147711	-0.240933	0.359948	-0.068795	-0.159173	-0.15283	0.33407	-0.235027	-0.264507	-0.247546	-0.0405309	-0.031878	-0.0107097	-0.0924811	0.0818945	-0.196662	-0.380647	0.228896	0.224323	0.157587	0.271264	-0.0557044	-0.0645836	0.0848619	-0.00453005	0.0964155	0.418205	0.13129
MORI_PRE_BI_LYMPHOCYTE_UP	7.72165e-06	0.0344231	0.049112	-0.164096	-0.0619992	-0.425851	-0.118999	0.346596	-0.529275	-0.401677	-0.391287	-0.527777	0.339126	-0.262721	-0.279056	-0.156979	0.100637	0.106944	0.247909	-0.26057	0.233644	-0.459568	0.346904	0.317905	0.494953	0.508638	0.200835	-0.547853	0.471232	0.384276	0.483957	-0.331028	-0.190702	0.412922	0.587778	0.137089	0.541137	0.0815125	-0.46111	-0.310279	-0.415009	-0.39239	-0.155186	0.334897	-0.395982	-0.188464	-0.389828	-0.25219	0.0853964
DOANE_RESPONSE_TO_ANDROGEN_UP	7.7275e-06	0.0344415	0.153861	0.160389	-0.0445462	0.109187	0.0633017	-0.123134	-0.0319617	-0.0334749	0.000130106	0.217252	-0.077152	0.0152617	-0.0402631	-0.0642742	-0.224296	-0.00803598	-0.0662921	0.0344585	0.171212	0.0232872	0.0274595	-0.0312119	-0.00624119	-0.0145455	-0.101595	-0.0801408	-0.0902723	-0.14841	-0.108014	0.0647774	-0.0288537	-0.0428953	-0.0311095	-0.0108364	-0.0752854	-0.0784405	0.0232317	0.096302	0.210247	0.0725998	0.136116	-0.00242221	0.140571	-0.0344174	0.143301	0.23472	0.00574801
ZHOU_CELL_CYCLE_GENES_IN_IR_RESPONSE_6HR	7.73413e-06	0.0344633	-0.134522	-0.132999	-0.376214	-0.419854	-0.346534	0.407482	-0.530068	-0.364655	-0.388497	-0.526743	0.32996	-0.118518	-0.400489	-0.458964	0.0451474	0.228305	0.381699	-0.15031	-0.127806	-0.52604	0.47396	0.286157	0.308515	0.539006	0.192535	-0.604478	0.330232	0.353053	0.575663	-0.548661	-0.108173	0.400528	0.575905	0.372549	0.564936	0.335146	-0.511083	-0.575774	-0.58284	-0.420064	-0.393317	0.5642	0.0590457	-0.208901	-0.451469	-0.208509	0.0548074
NAKAMURA_CANCER_MICROENVIRONMENT_DN	7.98222e-06	0.0355608	-0.0431314	-0.391556	-0.00115964	-0.412915	-0.23379	0.0940682	-0.364896	-0.164652	-0.32798	-0.427509	0.314528	-0.0079506	-0.492319	-0.333434	-0.203863	0.123803	0.18986	-0.049819	0.146481	-0.223115	0.286234	0.026188	0.236402	0.206119	0.159572	-0.448387	0.264119	-0.0301791	0.591335	-0.336401	-0.196256	0.107275	0.54799	-0.242312	0.499699	0.178937	-0.473009	-0.246793	-0.201095	-0.332744	-0.268914	0.405283	-0.161769	-0.483829	-0.306394	-0.0895507	-0.113751
GRAHAM_NORMAL_QUIESCENT_VS_NORMAL_DIVIDING_DN	8.14312e-06	0.0362694	-0.0675862	-0.293245	-0.348404	-0.434274	-0.308768	0.426842	-0.539066	-0.459148	-0.43583	-0.553046	0.420407	-0.187394	-0.404908	-0.341159	0.159781	0.18942	0.386593	0.113454	0.109281	-0.527015	0.517423	0.36187	0.437336	0.497843	0.140402	-0.549593	0.401964	0.377392	0.618936	-0.494708	-0.0838897	0.448786	0.577518	0.351704	0.588125	0.320593	-0.553958	-0.490522	-0.502701	-0.444275	-0.341529	0.494556	-0.307099	-0.156849	-0.42902	-0.244394	0.0416332
WHITEFORD_PEDIATRIC_CANCER_MARKERS	8.14685e-06	0.0362779	-0.0886353	-0.247183	-0.321804	-0.56464	-0.394584	0.41403	-0.532527	-0.406211	-0.437601	-0.605998	0.364323	-0.119614	-0.501139	-0.444149	0.129409	0.169873	0.369646	0.0936479	-0.0781076	-0.483735	0.504472	0.476195	0.399799	0.437779	0.193528	-0.596833	0.432479	0.428708	0.586292	-0.584947	-0.0627117	0.344622	0.526417	0.352171	0.531029	0.325716	-0.555121	-0.483139	-0.495509	-0.477994	-0.329443	0.562634	-0.267389	-0.238932	-0.557753	0.0188159	0.0459933
REACTOME_CREB_PHOSPHORYLATION_THROUGH_THE_ACTIVATION_OF_RAS	8.15594e-06	0.0363103	-0.382774	-0.0642287	0.349637	0.215086	0.545218	0.238373	0.274096	0.435724	0.0836142	0.185773	-0.193763	0.286002	0.120729	0.269002	0.144938	-0.163742	-0.186974	-0.247812	-0.0316049	-0.344562	-0.476808	-0.211866	-0.0455717	0.0279274	-0.0750612	0.243137	-0.0298175	0.155477	-0.253092	0.363506	-0.189873	0.192713	-0.149957	0.214582	-0.216615	-0.00750111	0.494221	0.224521	0.247552	0.370827	0.483801	-0.400761	0.267889	-0.306433	0.312773	0.149873	0.260808
CROSBY_E2F4_TARGETS	8.2334e-06	0.0366469	-0.164863	-0.218718	-0.499765	-0.0757104	-0.475015	0.536676	-0.660987	-0.344586	-0.402033	-0.836058	0.452759	0.131553	-0.547721	-0.598612	0.30217	0.464598	0.512482	0.168502	-0.258296	-0.658747	0.549313	0.631699	0.21144	0.401452	-0.252395	-0.622281	0.437983	0.319536	0.776968	-0.60087	0.524225	0.178909	0.584323	0.244862	0.611819	0.574096	-0.791235	-0.602809	-0.631284	-0.497275	-0.345544	0.675726	-0.136235	-0.14414	-0.757021	-0.518667	0.290432
RAY_TUMORIGENESIS_BY_ERBB2_CDC25A_DN	8.48692e-06	0.0377668	0.0644912	0.0536877	0.0954289	0.020074	0.118299	-0.0438553	0.301028	-0.02063	0.022676	0.0160924	0.108884	-0.0822992	0.0491943	0.0592148	-0.134685	-0.128929	-0.0251318	-0.10317	-0.0767167	-0.0132265	-0.0714638	-0.284363	-0.0878419	0.149169	0.0151738	0.12832	-0.14849	-0.0130278	-0.0847555	0.0358189	-0.129701	-0.00998482	-0.196501	-0.155897	-0.251822	-0.100497	0.0145668	0.0663733	0.229825	0.202425	0.109329	-0.099773	-0.0784023	0.169453	0.178876	0.187629	0.183061
WHITFIELD_CELL_CYCLE_G1_S	8.5858e-06	0.0381982	-0.247192	0.0109249	-0.0849583	-0.0074932	-0.0686884	0.237043	-0.208303	-0.232521	0.0488561	-0.275735	-0.00515782	0.193977	-0.0788678	-0.259352	0.112461	0.186185	-0.0567034	0.0952287	-0.194456	-0.186217	0.0820148	0.09613	-0.0913592	0.231639	-0.0532563	-0.174921	0.0772386	0.0640662	0.217852	-0.295097	-0.126146	-0.0192201	0.114792	0.270188	0.147929	0.165517	-0.201642	-0.159213	-0.281913	-0.0313038	-0.0867848	0.278695	-0.1405	-0.137961	-0.179823	-0.204477	0.0811445
CHICAS_RB1_TARGETS_GROWING	8.97898e-06	0.0399385	-0.172451	-0.332107	-0.0351805	-0.293196	-0.0590922	0.0688395	-0.214788	-0.217631	-0.250479	-0.332917	0.241909	0.132525	-0.271626	-0.21982	-0.157848	-0.0473809	0.318827	-0.053074	-0.223813	-0.236724	0.201934	0.0511366	-0.0380914	0.208013	-0.146232	-0.234864	-0.0253298	0.242918	0.28951	-0.247976	-0.237528	0.10719	0.159429	0.0150544	0.189639	0.00787794	-0.259171	-0.279358	-0.206472	-0.279076	-0.334883	0.180567	-0.0504389	0.0115026	-0.24415	0.0416992	0.0891696
REACTOME_BILE_ACID_AND_BILE_SALT_METABOLISM	9.26327e-06	0.0411938	0.259613	-0.134942	0.533775	0.297565	0.356957	-0.0768806	0.332938	-0.288277	0.325276	0.115916	-0.164062	-0.234301	0.321889	0.452363	0.489934	0.454992	0.323379	-0.230643	0.361488	-0.263984	-0.54086	-0.571777	0.457748	0.295223	0.384183	0.359393	0.251179	-0.0134209	-0.398612	-0.121832	0.374937	0.573815	0.181631	-0.488759	0.219883	-0.65591	0.065341	0.396296	0.0331159	0.00806923	0.210891	-0.0907821	0.415226	-0.10299	-0.122377	0.402848	0.187083
KIM_HYPOXIA	9.29231e-06	0.0413136	0.175153	-0.55445	-0.379793	-0.000911022	-0.535611	-0.352645	-0.48086	-0.177546	-0.23793	-0.41249	0.0710394	-0.229044	0.0641294	-0.322659	-0.168736	-0.355666	-0.228464	0.0393341	0.300509	-0.435694	-0.0876526	0.19218	0.248971	0.220844	0.559407	-0.396023	0.310001	0.348692	0.409415	0.188148	-0.324256	-0.161672	0.498318	-0.19541	0.512443	-0.0608777	-0.370228	-0.37665	0.245898	-0.600505	-0.498658	-0.156445	-0.227305	-0.500842	0.201186	-0.0727867	-0.299905
GOBERT_OLIGODENDROCYTE_DIFFERENTIATION_UP	9.40691e-06	0.0418137	-0.106591	-0.181906	-0.253011	-0.317326	-0.271431	0.19207	-0.349266	-0.285121	-0.226266	-0.377184	0.261458	0.0159535	-0.288912	-0.324638	0.0698088	0.0154814	0.246819	-0.0814184	-0.113704	-0.306426	0.318456	0.2766	0.135011	0.270014	0.000934319	-0.364723	0.18355	0.177911	0.411999	-0.331979	0.0142477	0.0978561	0.326265	0.23114	0.347913	0.202444	-0.350788	-0.283958	-0.34057	-0.357173	-0.310692	0.382728	-0.0102882	-0.0711297	-0.376924	-0.0230612	0.0915397
FURUKAWA_DUSP6_TARGETS_PCI35_DN	9.87207e-06	0.0438715	-0.0129686	-0.418414	-0.314625	-0.347323	-0.357412	0.202107	-0.492465	-0.255287	-0.212885	-0.426513	0.150307	-0.155765	-0.299452	-0.365881	-0.11738	-0.012951	0.18444	0.223832	-0.0311307	-0.47618	0.451404	0.393506	0.233766	0.333792	0.0645753	-0.47385	0.139184	0.231156	0.447233	-0.216654	-0.00877629	0.192095	0.418198	0.157921	0.500767	-0.000125807	-0.398189	-0.421874	-0.219476	-0.442582	-0.456608	0.462135	0.00737456	-0.294537	-0.390458	-0.0763602	-0.079387
SEMBA_FHIT_TARGETS_DN	1.01599e-05	0.0451404	0.212185	-0.146499	-0.480711	-0.131165	-0.153206	0.35494	-0.0266024	0.0093408	-0.319224	-0.470531	0.481886	0.284572	-0.39	-0.358096	-0.127783	0.0716626	0.54182	0.0557245	-0.0200384	-0.381205	0.552542	0.476946	0.251087	0.37746	-0.08	-0.526924	0.424076	0.131711	0.549997	-0.668529	0.0866403	0.387474	0.545466	0.547393	0.604777	0.374497	-0.279662	-0.326337	-0.18352	-0.437515	-0.551068	0.506897	0.217924	0.0131843	-0.522896	-0.118157	-0.0843535
REACTOME_TRANSCRIPTION	1.02298e-05	0.0454407	0.0359055	0.0426719	-0.0153861	-0.0460545	0.0770027	0.17318	-0.183425	-0.163495	-0.350818	-0.367028	0.0322931	-0.255175	-0.180964	-0.184289	0.0739328	0.0320909	-0.131847	-0.00802226	0.244984	-0.242321	0.343124	0.218604	0.345066	0.199446	0.227597	-0.273902	0.269244	0.30719	0.350784	-0.365125	-0.264926	0.13509	0.378248	0.24717	0.345338	0.367845	-0.390402	-0.246658	-0.391504	-0.0660945	0.0732916	0.176988	-0.370582	-0.164172	-0.311759	-0.292423	0.00711777
EGUCHI_CELL_CYCLE_RB1_TARGETS	1.0329e-05	0.045871	0.0213133	-0.46722	-0.544685	-0.499995	-0.410694	0.516944	-0.554058	-0.324154	-0.399719	-0.606253	0.437359	-0.281354	-0.557953	-0.493079	0.179364	0.316769	0.451157	-0.0360669	-0.049906	-0.591626	0.545942	0.371311	0.389319	0.554688	0.0641713	-0.683744	0.441392	0.522339	0.717798	-0.648443	-0.114768	0.424279	0.616117	0.331153	0.656827	0.285313	-0.686676	-0.456601	-0.712424	-0.566436	-0.399227	0.550478	-0.264752	-0.171619	-0.600729	-0.378345	0.204398
BILD_MYC_ONCOGENIC_SIGNATURE	1.06406e-05	0.0472443	0.00724268	0.150337	-0.177849	-0.1709	-0.386374	-0.0577733	-0.15944	-0.150632	0.0850336	-0.18452	-0.0700359	-0.133369	-0.312007	-0.325396	0.0328211	-0.207518	-0.316546	0.0760441	0.102802	0.0231448	0.203014	0.0759904	0.143047	-0.144991	0.175353	-0.358833	0.181175	-0.0992482	0.313328	0.0428958	0.107686	-0.0974286	0.253241	0.0135805	0.233634	-0.00611017	-0.202223	-0.294858	-0.138363	-0.299012	-0.295485	0.141334	0.0577642	-0.0792625	-0.254657	0.0361581	-0.0980656
RHODES_UNDIFFERENTIATED_CANCER	1.07801e-05	0.0478527	0.12186	-0.353401	-0.31282	-0.58859	-0.416627	0.503423	-0.577411	-0.481175	-0.58253	-0.623725	0.388038	-0.0181209	-0.475498	-0.272989	-0.156747	0.293841	0.287148	-0.20664	0.261874	-0.500994	0.506171	0.338168	0.492846	0.422313	0.277376	-0.542224	0.463876	0.445286	0.648647	-0.530994	-0.170867	0.479013	0.658982	-0.0592649	0.645106	0.137285	-0.570714	-0.465961	-0.557186	-0.437547	-0.353388	0.573059	-0.441935	-0.258769	-0.521332	-0.334035	-0.0714719
PID_AURORA_A_PATHWAY	1.11063e-05	0.0492897	0.0419346	-0.226088	-0.320562	-0.393539	-0.0862934	0.0974152	-0.366196	-0.283871	-0.431226	-0.413944	0.00401246	-0.24523	-0.376005	-0.30149	0.121389	-0.142853	0.192708	0.00975201	-0.093465	-0.594527	0.313427	0.163312	0.150245	0.189637	0.0792265	-0.268486	0.0569381	0.302181	0.466465	-0.174358	-0.137492	0.21833	0.257725	0.092822	0.318916	0.285723	-0.381945	-0.347674	-0.377009	-0.388106	0.0163732	-0.0450735	-0.0461509	-0.250243	-0.316823	0.354869	-0.0607752
[truncated: 83 more columns]

## Sheet: Sipplementary 2
Input Sample	B cells naive	B cells memory	Plasma cells	T cells CD8	T cells CD4 naive	T cells CD4 memory resting	T cells CD4 memory activated	T cells follicular helper	T cells regulatory (Tregs)	T cells gamma delta	NK cells resting	NK cells activated	Monocytes	Macrophages M0	Macrophages M1	Macrophages M2	Dendritic cells resting	Dendritic cells activated	Mast cells resting	Mast cells activated	Eosinophils	Neutrophils	P-value	Pearson Correlation	RMSE
R01_003	0.232047	0	0.088973	0	0	0.204517	0.087486	0	0	0	0.116919	0	0	0	0	0.080297	0.065289	0.08173	0	0.016249	0	0.026493	0.95	-0.0461	1.08719
R01_006	0.31494	0	0.191157	0	0.0006	0.198012	0	0.048554	0	0	0.009224	0.008356	0	0	0.014612	0.212771	0	0	0	0	0.001809	0	0.24	0.0786474	1.04689
R01_012	0.226397	0	0.08476	0	0	0.200925	0	0.02102	0	0	0	0.042586	0	0	0	0.165125	0.034746	0.09088	0.058988	0	0.043167	0.031405	0.32	0.0523561	1.04447
R01_013	0	0.113241	0.031647	0.013111	0	0.236955	0	0	0.024108	0	0	0.044867	0.025939	0	0	0.288604	0	0.190064	0.014646	0	0	0.016817	0.77	-0.0264	1.09299
R01_014	0	0.100248	0.021622	0	0.0864972	0.327305	0	0	0	0	0	0.064232	0	0	0	0.150814	0	0.032754	0.189493	0	0.027035	0	0.63	-0.0101	1.08579
R01_016	0.220602	0	0.206985	0	0	0.155576	0	0.054675	0	0	0	0.048982	0.031757	0.057756	0.063601	0	0.069186	0.06704	0.023838	0	0	0	0.54	0.00343803	1.06283
R01_017	0.158001	0	0.102427	0	0.200018	0.29235	0	0	0	0.063516	0.04854	0	0.002676	0.040534	0	0	0	0.0261	0	0	0.065839	0	0.95	-0.0476	1.12699
R01_021	0.275892	0	0.03595	0.015582	0	0.021106	0	0	0.148666	0	0.018341	0	0	0.034517	0	0.060236	0	0.159727	0.128723	0	0.089603	0.011657	0.99	-0.0634	1.09736
R01_022	0.217349	0.059004	0.06357	0.013665	0	0.123631	0	0.096313	0	0	0.070078	0	0.012083	0	0	0.051951	0	0.042401	0.077349	0	0.172605	0	0.94	-0.041	1.0851
R01_023	0	0.226882	0.023671	0	0.300677	0.289701	0	0	0.031413	0	0.009423	0.030866	0	0	0.002732	0	0	0.016962	0	0	0.067673	0	0.31	0.0568033	1.10156
R01_024	0.307468	0	0.127529	0	0	0.12922	0	0.051239	0	0	0	0.069952	0.033594	0.010231	0.003565	0	0	0.15852	0	0.049833	0.058849	0	0.38	0.0458832	1.06449
R01_026	0.158406	0	0.029635	0.100813	0	0.200549	0.066649	0.057927	0.066758	0	0.053073	0	0.060771	0.070699	0	0	0.019895	0.026027	0	0.014989	0.073809	0	0.89	-0.0348	1.09499
R01_028	0.185127	0	0.091827	0.096467	0	0.150937	0	0	0	0	0	0.069343	0	0	0.026026	0.261962	0	0.014948	0	0.013336	0.031029	0.058998	0.94	-0.0415	1.08874
R01_032	0.191754	0	0.022946	0	0	0.12118	0.077788	0.0443	0	0.100181	0	0	0	0.112988	0.018416	0.134986	0.066021	0.003276	0.081694	0	0.024468	0	0.05	0.169745	1.00558
R01_034	0.259309	0	0.028294	0	0.0137595	0.192206	0	0	0.01754	0	0.046769	0.019784	0.017875	0	0	0.253157	0.095182	0	0.056123	0	0	0	1	-0.0693	1.09999
R01_037	0.108955	0	0.215695	0.039714	0	0.107115	0.030136	0.055403	0	0.017727	0	0.026784	0	0	0.091935	0.200401	0.069816	0	0.030042	0	0	0.006279	0.2	0.0930089	1.02806
R01_038	0.158333	0	0.243521	0	0.0269558	0.181474	0.030864	0	0	0	0.04467	0.005116	0	0.026161	0.089591	0.083587	0	0	0.082592	0	0.027137	0	0.07	0.153335	1.00766
R01_041	0.296252	0	0.091513	0	0	0.19801	0	0.030487	0	0	0.124654	0	0	0.085468	0	0	0.084628	0	0	0.088987	0	0	0.99	-0.0645	1.10867
R01_043	0.157454	0	0.052401	0.042423	0	0.1838	0	0.129599	0	0	0	0.058159	0.043131	0	0.037991	0.155985	0.0005	0.040117	0.049063	0	0	0.049381	0.43	0.029949	1.05887
R01_048	0.051809	0	0.586985	0	0.0762732	0.143741	0.012406	0	0	0	0.033139	0	0	0.045835	0.04223	0.007581	0	0	0	0	0	0	0.04	0.17804	1.014
R01_049	0.185595	0	0.111821	0	0.0168915	0.214453	0.002946	0.03347	0	0	0.148159	0	0	0	0.016034	0.105436	0.044901	0	0	0.06748	0.052815	0	0.99	-0.0645	1.09805
R01_054	0.512376	0	0.06155	0	0	0.083797	0	0	0.081719	0	0.08486	0	0	0	0.0007	0	0.134679	0	0	0.00457	0	0.03571	1	-0.0807	1.14761
R01_056	0.209771	0	0.185089	0.011815	0	0.0814	0.003893	0	0.003846	0	0	0.001269	0.017685	0.066546	0.045885	0.1452	0.218399	0	0.003252	0	0	0.005949	0.02	0.290483	0.960493
R01_057	0.174797	0	0.004137	0.021041	0	0.100951	0	0.017116	0	0	0	0.105032	0.006415	0.018374	0	0.176061	0	0.138373	0.109088	0	0.123132	0.005482	0.18	0.0957571	1.04084
R01_059	0	0.142017	0	0.004559	0	0.082135	0	0.103027	0	0	0.022068	0	0.001933	0	0.053799	0.206172	0.160032	0.106364	0.0004	0	0.088166	0.029333	0.26	0.0650418	1.0513
R01_060	0.247715	0	0	0	0	0.147534	0	0	0	0	0	0.051317	0.008213	0.017062	0	0.233939	0	0.105382	0.122313	0	0.043982	0.022543	0.69	-0.0166	1.08059
R01_061	0.073513	0	0.283631	0.022919	0	0.077669	0	0.01717	0.00876	0.043075	0	0.026197	0	0.264049	0.068748	0.114271	0	0	0	0	0	0	0	0.471318	0.882124
R01_062	0.215139	0	0.061882	0	0.0226867	0.085924	0.034069	0.005971	0.023666	0	0.107671	0	0.006945	0.050277	0.179078	0.191592	0.0002	0	0.00392	0.010985	0	0	0.02	0.306515	0.964667
R01_063	0	0.030185	0.128153	0	0	0.106539	0	0.028371	0	0	0	0.049016	0	0	0.055458	0.224221	0.323258	0	0	0	0.041342	0.013457	0.04	0.178646	1.00907
R01_064	0.085189	0	0.009388	0.042199	0	0.211168	0	0	0	0	0.212175	0	0.076904	0	0	0.0461	0	0.066023	0	0.046194	0.155878	0.048781	0.69	-0.0175	1.10717
R01_066	0.095312	0	0.022191	0	0.230352	0	0	0.049656	0	0	0.218603	0	0.017796	0.013372	0.003743	0.336896	0.008328	0	0	0	0	0.003751	1	-0.0934	1.13892
R01_067	0.109202	0	0.028697	0.127371	0	0.066898	0.001727	0.025004	0.004063	0	0	0.060198	0.007278	0.03621	0.098487	0.217972	0.074358	0	0.119175	0	0.003994	0.019365	0.02	0.279181	0.966306
R01_068	0.024349	0	0.110581	0	0	0.258832	0	0.005509	0	0	0	0.043721	0	0	0.050132	0.18097	0.21262	0.021604	0.073634	0	0	0.018046	0.04	0.199001	0.992588
R01_069	0.3744	0	0.0008	0.116815	0	0.219769	0	0	0	0	0	0.088731	0.043382	0	0.087842	0	0.048179	0.015582	0.0007	0	0	0.003866	0.99	-0.0631	1.14685
R01_072	0.043914	0	0.116137	0.048499	0	0.235635	0	0.021799	0	0	0	0.027625	0	0	0.071007	0.164544	0.172464	0.024539	0.042735	0	0	0.031101	0.04	0.212545	0.98779
R01_073	0.127865	0	0.163664	0	0	0.375807	0	0.111059	0	0	0.01662	0.022242	0	0.010472	0	0	0	0.113302	0	0	0.058969	0	0.44	0.0289418	1.07721
R01_076	0.121118	0	0	0	0.0648597	0.198977	0	0	0	0	0	0.003421	0.007441	0	0	0.281983	0	0.01213	0.151879	0	0.158191	0	0.57	0.00113884	1.07543
R01_078	0.133055	0	0.534969	0	0.0267417	0.143031	0.0008	0.024321	0	0	0.025325	0	0	0.024304	0.065337	0.022082	0	0	0	0	0	0	0.1	0.129593	1.03056
R01_079	0.156514	0	0	0	0	0.182941	0	0.078389	0	0	0	0.032184	0	0.044863	0.0007	0.162541	0	0.242729	0.015601	0	0.083582	0	1	-0.0692	1.11867
R01_080	0.169765	0	0.06677	0.025485	0	0.085801	0	0.013113	0.006805	0	0	0.072825	0.027428	0	0	0.156523	0.088847	0	0.239406	0	0.029467	0.017765	0.51	0.00842219	1.06792
R01_081	0.106716	0	0.114862	0	0	0.246381	0	0	0.020933	0.014732	0	0.019235	0	0	0.025563	0.12246	0	0.139245	0.183136	0	0	0.006739	0.26	0.0656157	1.0443
R01_084	0	0.226447	0.072717	0.034276	0	0	0	0.308546	0	0	0.066443	0.013988	0.014108	0	0	0.08352	0	0.075135	0	0.086577	0.018243	0	0.53	0.00685899	1.07565
R01_089	0.208689	0	0.025952	0	0.0350778	0.072712	0.098082	0	0	0.167628	0	0.01163	0	0.02649	0.038285	0.083221	0	0.01775	0.12617	0	0.07881	0.009503	0.92	-0.0384	1.08739
R01_091	0.145479	0	0.044802	0	0.083858	0.266733	0.024262	0	0	0	0.172812	0	0	0.0001	0.140881	0.09232	0.001591	0	0.018625	0	0	0.008497	0.21	0.0890546	1.07193
R01_094	0.10988	0	0.040181	0	0.111528	0.059648	0	0	0.062801	0	0.057195	0.011628	0.01124	0.075426	0.009579	0.210747	0.014996	0.049734	0.062331	0	0.113087	0	0.04	0.175165	1.00291
R01_098	0.118627	0	0	0	0	0.212084	0	0	0.212455	0	0	0.108894	0.06047	0	0	0.131879	0	0.046887	0.012138	0	0.096565	0	1	-0.0672	1.11064
R01_099	0.095032	0	0.080504	0	0.237799	0	0	0	0.069222	0.045311	0	0	0	0.007605	0	0.238692	0.083258	0.047902	0.05921	0	0.016313	0.019152	0.68	-0.0148	1.07119
R01_100	0.128373	0	0.362999	0	0	0.138798	0.011233	0	0	0.023682	0	0	0	0	0	0.265443	0	0.03796	0	0	0	0.031512	0.18	0.0968989	1.02931
R01_101	0.16127	0	0.128393	0	0	0.377805	0	0	0	0	0	0.086022	0	0.035517	0.01661	0	0.034167	0.028589	0.129251	0	0	0.002376	0.86	-0.0325	1.09117
R01_102	0.126313	0	0.109367	0	0.19972	0.183923	0	0	0.024999	0	0.012366	0.06191	0	0	0.015631	0.131555	0	0	0.134216	0	0	0	0.89	-0.0355	1.0903
R01_104	0.339702	0	0.056156	0	0.201194	0.079478	0.056304	0	0	0	0	0	0.016289	0.0009	0	0.105784	0	0.02362	0.107434	0	0	0.013184	0.84	-0.0316	1.09779
R01_105	0.014812	0	0.075293	0	0.102721	0.137851	0	0	0	0	0.088163	0	0	0	0.022659	0.044131	0	0.111213	0.046428	0	0.079861	0.276868	0.83	-0.0301	1.11677
R01_107	0.272473	0	0.184989	0.027494	0	0.068143	0	0.030266	0	0.004854	0	0.079079	0	0	0.028566	0.145931	0.009036	0	0.040945	0.06653	0.041693	0	0.9	-0.0365	1.08503
R01_109	0.210595	0	0.090068	0	0.038584	0.212063	0.032577	0	0.058587	0	0	0	0	0.021176	0.050654	0.15661	0.077868	0	0.015549	0	0.031476	0.004193	0.91	-0.0376	1.07769
R01_110	0.235456	0	0.350768	0	0.110928	0.156193	0.015874	0	0	0	0.060927	0	0	0.011614	0.022613	0.020709	0	0	0.008562	0	0.006354	0	0.53	0.00725562	1.07471
R01_111	0.214951	0	0.049441	0	0	0.236327	0.062458	0.052194	0.020474	0	0	0	0.02551	0	0	0.072697	0.069606	0.091	0.012258	0	0.093084	0	0.88	-0.0342	1.07807
R01_112	0.121941	0	0.302682	0.002327	0	0.149681	0	0	0.002317	0	0	0.04415	0	0.038533	0.100975	0.079053	0.038606	0	0	0.03498	0.079712	0.005044	0.81	-0.0282	1.07329
R01_113	0.224492	0	0.015377	0.086079	0	0	0	0.048297	0	0.049484	0	0.068781	0	0	0.080428	0.229234	0.001524	0.004525	0.130098	0	0.061681	0	0.79	-0.0275	1.09089
R01_114	0.208153	0	0.192294	0	0	0.181525	0	0.049111	0	0	0	0.050809	0	0.026819	0.073179	0.069529	0.024181	0	0.109929	0	0.001632	0.01284	0.91	-0.0371	1.07412
R01_115	0.248748	0	0.033993	0	0.157171	0.144246	0	0	0.0005	0	0	0.09685	0	0.071346	0.07373	0.101627	0	0	0.050459	0	0	0.02132	0.9	-0.0365	1.10113
R01_116	0.208101	0	0.147647	0	0.0487245	0.22195	0	0	0	0	0.015348	0.025532	0	0	0.006097	0.116102	0.071222	0.020979	0.035558	0	0.076616	0.006122	0.91	-0.0376	1.07288
R01_117	0.158895	0	0.083637	0	0.0863697	0	0	0.090378	0	0	0.007382	0.014343	0.051987	0	0	0.256636	0	0.1955	0.054873	0	0	0	0.84	-0.0304	1.08504
R01_118	0.151509	0	0.190324	0.02921	0.062599	0.051267	0.078484	0	0	0	0.060906	0	0.002038	0.073299	0	0.116658	0	0.04783	0.091246	0	0.044631	0	0.94	-0.0392	1.06416
R01_120	0.118308	0	0.14535	0.012539	0.00938044	0.087668	0.03629	0	0	0	0.075815	0	0	0	0	0.096857	0	0.125985	0.020626	0.014969	0.162491	0.093721	0.89	-0.0356	1.0756
R01_121	0.151571	0	0.232755	0	0	0.243666	0	0	0.012543	0	0	0.020941	0	0.03768	0.054307	0	0.080537	0	0	0.02509	0.032171	0.108738	0.92	-0.038	1.07427
R01_122	0.156409	0	0.351503	0	0.118276	0.171131	0.005294	0	0	0	0.008174	0.003242	0.010101	0	0.01405	0.076211	0	0	0.085608	0	0	0	0.87	-0.0328	1.07659
R01_123	0.081163	0	0.018871	0	0.0906216	0.203238	0	0	0	0	0	0.119655	0.029775	0	0	0.129576	0	0.05788	0.176229	0	0.087697	0.005294	0.9	-0.0362	1.09254
R01_125	0.192404	0	0.06811	0	0.375372	0	0	0.004396	0.159665	0	0	0	0	0	0	0	0.012121	0	0	0	0.187932	0	0.83	-0.03	1.12122
R01_126	0.109738	0	0.06631	0	0.0398337	0.419227	0	0	0.034194	0	0	0.003725	0.072214	0.063056	0	0.043583	0.038197	0.015059	0.07237	0	0.022492	0	0.89	-0.0349	1.09354
R01_127	0.142257	0	0.06757	0	0	0.191828	0.020215	0.026318	0	0.057428	0	0	0	0.015153	0	0.163017	0	0.115821	0.139596	0	0.060797	0	0.89	-0.0361	1.07421
R01_128	0.199221	0	0.077356	0	0	0.212533	0	0.008119	0.001298	0	0.086979	0	0	0	0	0.191198	0.014452	0.089308	0.072837	0	0.011491	0.035207	0.91	-0.0372	1.07681
R01_130	0.113372	0	0.06698	0	0.174101	0.081247	0	0	0.029267	0	0.105508	0	0	0	0.045524	0.217727	0.051121	0.014402	0.051903	0	0.048848	0	0.94	-0.0393	1.0798
R01_131	0.294559	0	0.004959	0	0	0.301827	0.047101	0	0.090358	0	0	0.03645	0.030251	0.042855	0.026048	0.008175	0	0.024448	0.085038	0	0.00793	0	0.86	-0.0326	1.10142
R01_132	0.16108	0	0.35515	0.001703	0	0.053422	0	0.068026	0	0	0	0.084381	0	0	0.020898	0.094496	0.022093	0.001344	0.081284	0	0.049596	0.006525	0.94	-0.0406	1.07219
R01_133	0.006371	0.152077	0.15128	0.138548	0	0.07182	0	0	0	0.025516	0.016018	0.021885	0.113956	0.048165	0.036189	0	0.058112	0.06444	0.039321	0.046078	0.0004	0.009847	0.91	-0.0375	1.07263
R01_134	0.175533	0	0.373417	0.058676	0	0.016635	0	0.048029	0	0.0006	0	0.01558	0	0	0.071555	0.14538	0	0.002386	0	0.027655	0.044919	0.01966	0.88	-0.0339	1.0753
R01_136	0.215089	0	0.003516	0	0.155504	0.281235	0.079256	0	0	0	0.014858	0	0	0.011462	0	0.104164	0	0	0.059198	0	0.011722	0.063996	0.88	-0.0337	1.10517
R01_137	0	0.221564	0.092329	0	0.0680851	0.20084	0	0	0	0	0.050735	0.007243	0.055432	0.010029	0.002391	0.071554	0.095026	0.004125	0.098165	0	0.022483	0	0.94	-0.0394	1.07074
R01_138	0.173674	0	0.303946	0.003439	0.0857563	0.159203	0.024241	0	0	0	0.045346	0	0	0	0.014809	0.015238	0.01554	0	0.109102	0	0.036668	0.013037	0.89	-0.0346	1.07441
R01_140	0.253629	0	0.09225	0.072737	0.0151581	0	0.142947	0	0	0	0	0	0.053196	0.123031	0	0.032572	0	0.046456	0.055698	0	0.112325	0	0.91	-0.0373	1.07488
R01_141	0.502307	0.004895	0	0	0.0998319	0	0	0.0005	0.114063	0.122505	0	0	0	0.031322	0.080965	0.039234	0	0	0.004372	0	0	0	0.76	-0.0246	1.1413
R01_142	0.099767	0	0.059278	0	0.09147	0.231377	0	0	0.07726	0	0.107874	0	0	0	0	0.130187	0.021317	0.028608	0.0576	0.018588	0.043695	0.032979	0.91	-0.0375	1.08806
R01_144	0.07896	0	0	0	0	0.229748	0.019204	0.025101	0.026833	0	0.046712	0.00822	0	0	0	0.143974	0.13602	0.009363	0.093781	0	0.131378	0.050706	0.94	-0.0417	1.07973
R01_147	0.209961	0	0	0	0	0.239852	0	0	0.021643	0	0	0.051524	0.033291	0	0	0.255734	0	0.038624	0.06049	0	0	0.088881	1	-0.077	1.10536
R01_149	0.431649	0	0.073566	0	0	0.247514	0	0	0.074665	0	0	0.092868	0	0.079738	0	0	0	0	0	0	0	0	1	-0.0939	1.15484
R01_151	0.228432	0	0	0	0.00875984	0.422809	0	0.039977	0	0	0.051132	0.006873	0	0	0	0.141219	0	0.100798	0	0	0	0	0.98	-0.0561	1.12483
R01_152	0.075381	0	0.168254	0	0.0895392	0.179769	0.024496	0	0	0	0.009152	0.050452	0.014921	0.104726	0.037061	0.136699	0	0	0.089617	0	0	0.019933	0.31	0.0543304	1.04237
R01_154	0.070786	0	0.00489	0.012916	0	0.237817	0	0.010343	0	0	0	0.095742	0.032871	0	0	0.195022	0.043858	0.063118	0.064314	0	0.125451	0.042873	0.41	0.0394408	1.05927
R01_160	0.155504	0	0.047768	0.008821	0	0.190556	0	0.037532	0.003176	0	0.203188	0	0.001669	0	0.075707	0.094607	0.071342	0	0	0.089946	0.020183	0	1	-0.0939	1.13
R01_004	0.061772	0	0.234876	0	0	0.022211	0.017343	0.140857	0	0.132421	0	0.011391	0	0.071151	0.132928	0.076304	0.037513	0.001107	0.042505	0	0	0.01762	0.03	0.214697	0.99176
R01_005	0.323878	0	0.192132	0	0	0.298985	0	0.012359	0	0	0	0.058732	0.018329	0.010748	0	0	0	0.056566	0.028272	0	0	0	0.99	-0.0619	1.11092
R01_007	0.126738	0	0.034058	0.156035	0	0.234818	0.118519	0	0.001726	0	0.012243	0.007029	0.008203	0.003123	0.14226	0.011316	0.122366	0	0.021567	0	0	0	0.08	0.142949	1.03589
R01_015	0.18279	0	0.216631	0.002629	0.00254073	0.14937	0.018388	0	0	0.01043	0	0.029444	0.022918	0.024426	0.011536	0.14929	0.133636	0	0.018173	0	0.009591	0.018208	0.1	0.124075	1.01502
R01_018	0.303702	0	0.244899	0	0	0.274673	0.01375	0	0	0	0.046697	0	0.003714	0.109628	0	0	0	0	0	0	0.002938	0	1	-0.0904	1.11591
R01_027	0.080434	0	0.001092	0.101395	0	0.1473	0.013172	0	0	0	0.099588	0	0	0.012761	0.020076	0.206543	0.135762	0	0	0.166582	0	0.015294	0.26	0.0664299	1.06476
R01_029	0.266381	0	0	0	0.191965	0	0	0	0	0	0.205483	0	0	0	0	0	0.10354	0	0	0.205554	0.027076	0	1	-0.0725	1.15231
R01_031	0.357051	0	0.164015	0	0	0.166896	0.050252	0.023006	0	0	0.017485	0	0	0.066576	0	0.103811	0.018867	0	0	0	0.001435	0.030606	0.33	0.048998	1.05944
R01_033	0.358021	0	0	0.001075	0	0.258602	0	0.01037	0	0	0	0.10951	0	0.1143	0	0	0.003537	0	0.144585	0	0	0	0.97	-0.0513	1.12446
R01_035	0	0.101825	0.501437	0	0	0.186118	0	0	0	0	0.035711	0	0	0	0.010022	0.050387	0.055325	0	0	0.012575	0.04294	0.00366	0.22	0.0847426	1.03794
R01_039	0.083841	0	0.2547	0	0.0491109	0.101044	0	0	0	0	0.060643	0	0.06437	0.03476	0.014967	0.116192	0	0	0.220372	0	0	0	0.16	0.107207	1.02393
R01_040	0.246095	0.055955	0.088252	0	0.25322	0.223756	0.013259	0	0	0	0	0.001208	0.003895	0	0	0.11399	0	0	0.0004	0	0	0	0.04	0.187133	1.02397
R01_042	0.212542	0	0.309951	0	0	0.144174	0	0.028152	0	0	0.005144	0	0	0.037105	0.040905	0.10544	0	0.027275	0.035144	0.012567	0.0416	0	0.31	0.0557957	1.04067
R01_046	0.16278	0	0.365899	0	0	0.127514	0.02024	0	0	0	0.047559	0	0	0.001409	0.021402	0.147605	0.057213	0	0.028512	0.019868	0	0	0.13	0.116782	1.01863
R01_051	0.216574	0	0.184673	0	0	0.231335	0	0.019765	0	0	0.086304	0	0.033454	0.009373	0	0.030131	0	0.079447	0	0.047542	0.061401	0	0.61	-0.0052	1.06862
R01_052	0.039018	0	0.072316	0	0.0684894	0.063922	0	0.049099	0.084873	0	0.01172	0.106616	0.01687	0	0	0.01154	0	0.033874	0.13986	0	0.111003	0.190801	0.89	-0.0351	1.10153
R01_055	0.039604	0.04964	0.152969	0	0	0.106665	0.06332	0.124353	0	0	0.080648	0	0	0	0	0.099465	0	0.08256	0.009886	0.104271	0.086619	0	0.73	-0.0208	1.06935
R01_065	0.253747	0	0.112502	0	0.0969443	0.226828	0	0.004536	0.188618	0	0.026673	0	0	0	0	0	0.067281	0	0.0003	0	0	0.022598	1	-0.0789	1.12907
R01_071	0.411171	0	0	0	0	0.279874	0	0	0	0	0	0.197582	0	0.011895	0	0	0	0	0.063588	0	0	0.03589	0.89	-0.0344	1.15787
R01_077	0.308212	0	0.11473	0	0	0.20759	0.003233	0	0	0	0.094911	0	0.020659	0.01256	0	0.111834	0	0.038238	0	0.031043	0.026131	0.030859	0.71	-0.0189	1.08226
R01_083	0	0.295784	0.346472	0	0.0712922	0.130108	0.03851	0	0	0	0	0.016967	0	0.025196	0.029822	0.02488	0	0.005897	0.006798	0	0.008273	0	0.03	0.258256	0.974989
R01_093	0.082472	0	0.404101	0.00577	0.0669292	0.203673	0	0	0	0	0	0.072288	0.0004	0.147819	0	0.016504	0	0	0	0	0	0	0.38	0.0434298	1.05876
R01_096	0.115479	0	0.132584	0	0	0.166749	0	0.022227	0	0	0.052128	0.007009	0.027781	0	0.051833	0.310125	0	0.045718	0.043216	0	0	0.025152	0.03	0.261458	0.970007
R01_097	0	0.193353	0	0	0.125586	0.108486	0	0.04396	0	0	0.136837	0	0	0.159691	0	0.18629	0	0.031595	0	0.014202	0	0	1	-0.1016	1.12939
R01_103	0.035843	0	0.061235	0.104704	0	0	0.066471	0	0.140089	0.09484	0	0	0	0.008428	0.093502	0.224286	0.011032	0.005071	0	0.011116	0.143384	0	0.91	-0.0376	1.09073
R01_106	0.087161	0	0.302554	0	0	0.085806	0	0.047247	0	0	0.009271	0.047097	0	0.163016	0.021132	0.085206	0.020779	0	0	0.068075	0	0.062656	0.9	-0.0363	1.0822
R01_108	0.182748	0	0.088106	0.051221	0	0.134245	0	0.09218	0	0	0	0.066166	0	0.0004	0.056341	0.165975	0.079993	0	0.058156	0	0	0.024497	0.94	-0.0406	1.0776
R01_119	0.319054	0	0.11639	0.074454	0	0.018945	0	0	0.111341	0.005983	0.038361	0	0	0.226873	0.00636	0	0.005425	0.00173	0	0.008256	0.063456	0.003373	0.87	-0.0333	1.09961
R01_124	0.207632	0	0.098214	0	0	0	0	0.010601	0.091148	0	0.046877	0.023702	0	0	0.060871	0	0.329285	0	0	0.071636	0.060034	0	0.9	-0.0365	1.08227
R01_129	0.04851	0	0.032255	0	0.188936	0	0.021376	0	0.073861	0.047468	0.084826	0	0	0	0.110692	0.248675	0.055932	0.020632	0.01608	0	0.018256	0.032502	0.86	-0.0321	1.09659
R01_135	0.120602	0	0.103338	0.058579	0	0	0.045274	0.074496	0.111625	0	0	0	0	0	0	0.304568	0.114971	0	0	0	0.066547	0	0.94	-0.0392	1.08076
R01_139	0.076797	0	0.218584	0	0.028367	0.224638	0	0	0	0	0.056388	0	0	0	0.102205	0.073274	0.118407	0	0.071277	0	0	0.030063	0.9	-0.0368	1.07141
R01_145	0.06817	0	0.284108	0	0	0.199751	0	0	0	0	0	0.099621	0	0	0.073509	0.04137	0.150662	0	0.040662	0	0	0.042147	0.9	-0.0368	1.07292
R01_146	0	0.100558	0.195314	0	0	0	0	0	0.237484	0	0.10142	0.06597	0.035145	0.116269	0.048504	0.097995	0	0	0	0.001341	0	0	0.89	-0.0354	1.08899
R01_148	0.1743	0	0.032296	0	0	0.15174	0.027342	0	0.029791	0	0.001602	0.026438	0.025327	0.062666	0	0.201581	0	0.043427	0.163395	0	0.0393	0.020795	0.04	0.190399	0.997384
R01_150	0.190363	0	0	0.031684	0	0.212284	0.170291	0.086056	0	0	0.082894	0	0.004866	0	0.059215	0.025658	0.108887	0	0.027804	0	0	0	1	-0.0677	1.10896
R01_153	0.144013	0	0.047791	0.075377	0	0.059095	0.006726	0.01929	0.026704	0.020689	0.083912	0	0	0.078247	0.230148	0.154209	0	0	0.053798	0	0	0	0.01	0.336151	0.958892
R01_156	0.221188	0	0.458451	0	0.118123	0.097298	0	0	0	0	0	0.02915	0	0.008465	0	0.033469	0.017249	0	0	0	0.016608	0	0.68	-0.0154	1.0844
R01_157	0.201307	0	0.060613	0.095275	0	0.202047	0	0.116229	0	0	0	0	0.023508	0.038019	0.037793	0	0.048739	0.004869	0	0.082748	0.088854	0	0.95	-0.0462	1.09559
R01_158	0.113822	0	0.0015	0.166325	0	0.10291	0	0.037981	0.066467	0	0.018181	0.002781	0.041468	0.05395	0.031649	0.094212	0.088431	0	0	0	0.180323	0	0.89	-0.0361	1.08691
R01_159	0.442395	0	0.215607	0	0.0405565	0.214502	0.045449	0	0	0	0	0	0	0.004671	0.016178	0.020642	0	0	0	0	0	0	0.02	0.286163	0.976094
